# Supplementary material for: Combination treatment of mannose and GalNAc conjugated small interfering RNA protects against lethal Marburg virus infection
Source: PubMed Central journal article supplement — Mol Ther. 2022 Sep 15;31(1):269–81. doi: 10.1016/j.ymthe.2022.09.009 (PMC9840110; doi:10.1016/j.ymthe.2022.09.009), 2022-09-15
Supplement: mmc2.pdf [file mmc2.pdf]

# Combination treatment of mannose and GalNAc conjugated small interfering RNA protects against lethal Marburg virus infection

Xin Ye,<sup>1,4</sup> Richard Holland,<sup>1,4</sup> Mark Wood,<sup>1</sup> Chris Pasetka,<sup>1</sup> Lorne Palmer,<sup>1</sup> Eleni Samaridou,<sup>1</sup> Kevin McClintock,<sup>1</sup> Viktoriya Borisevich,<sup>2,3</sup> Thomas W. Geisbert,<sup>2,3</sup> Robert W. Cross,<sup>2,3</sup> and James Heyes<sup>1</sup>

<sup>1</sup>Genevant Sciences Corporation, Vancouver, BC V5T 4T5, Canada; <sup>2</sup>Department of Microbiology and Immunology, University of Texas Medical Branch, Galveston, TX 77555, USA; <sup>3</sup>Galveston National Laboratory, University of Texas Medical Branch, Galveston, TX 77555, USA

**Marburg virus (MARV) infection results in severe viral hemorrhagic fever with mortalities up to 90%, and there is a pressing need for effective therapies. Here, we established a small interfering RNA (siRNA) conjugate platform that enabled successful subcutaneous delivery of siRNAs targeting the MARV nucleoprotein. We identified a hexavalent mannose ligand with high affinity to macrophages and dendritic cells, which are key cellular targets of MARV infection. This ligand enabled successful siRNA conjugate delivery to macrophages both *in vitro* and *in vivo*. The delivered hexa-mannose-siRNA conjugates rendered substantial target gene silencing in macrophages when supported by a mannose functionalized endosome release polymer. This hexa-mannose-siRNA conjugate was further evaluated alongside our hepatocyte-targeting GalNAc-siRNA conjugate, to expand targeting of infected liver cells. In MARV-Angola-infected guinea pigs, these platforms offered limited survival benefit when used as individual agents. However, in combination, they achieved up to 100% protection when dosed 24 h post infection. This novel approach, using two different ligands to simultaneously deliver siRNA to multiple cell types relevant to infection, provides a convenient subcutaneous route of administration for treating infection by these dangerous pathogens. The mannose conjugate platform has potential application to other diseases involving macrophages and dendritic cells.**

## INTRODUCTION

Viral hemorrhagic fevers are a group of life-threatening infectious diseases caused by four virus families.<sup>1,2</sup> Among them, Marburg virus disease (MVD) resulted in 24%–88% fatality rates in past outbreaks according to World Health Organization (WHO). To date, there are no vaccines or antiviral therapies approved for MVD despite it still being endemic in central Africa.<sup>3</sup> Marburg virus (MARV) is a negatively stranded RNA virus that can be transmitted to humans from infected animals such as bats and nonhuman primates.<sup>4</sup> The mononuclear phagocyte system, including macrophages, monocytes, Kupffer cells, and dendritic cells, are primary target cells of MARV infection, and other cells, such as hepatocytes and fibroblast-like cells,

are also target cells.<sup>5</sup> The liver is the main target organ for MARV replication as the asialoglycoprotein receptor (ASGPR) expressed on hepatocytes enhances the infection of MARV.<sup>6–8</sup> MARV infection cause damage in multiple organs besides the liver, such as lymph nodes, spleen, lungs, gastrointestinal tract, kidneys, heart, and central nervous system.<sup>4</sup> Cell death in both infected cells and non-infected cells contributes to the MARV-induced tissue damage.<sup>9</sup> The MARV genome is a 19-kb RNA encoding seven viral proteins, including nucleoprotein (NP), VP35 (polymerase cofactor), VP40 (matrix protein), glycoprotein (GP), VP30 (transcription activator), VP24 (secondary matrix protein), and an RNA-dependent RNA polymerase (L polymerase),<sup>10</sup> which are potential targets for anti-MARV therapy development.

Short interfering RNAs (siRNAs) trigger specific and precise target gene silencing in a sequence-dependent manner through the naturally occurring RNA interference (RNAi) machinery inside.<sup>11</sup> Inhibition of hemorrhagic fever virus (HFV) with siRNA has been reported both *in vitro* and *in vivo*.<sup>12–14</sup> One of the key challenges in developing RNAi-based therapies is the development of efficient delivery platforms to promote cellular uptake of siRNAs. We previously developed a liver-targeting lipid nanoparticle formulation that enabled the first approved RNAi therapy.<sup>15</sup> This platform was also shown to be effective for siRNA-based treatment of MARV-infected rodents and nonhuman primates.<sup>12,13</sup> The LNP-siRNA modality has been widely investigated for various diseases.<sup>16,17</sup> Since then, ligand-siRNA conjugates have emerged as another siRNA-based modality, also resulting in approved RNAi therapies.<sup>18</sup> These conjugates are compatible with subcutaneous administration and generally more stable than LNP-siRNA, which is preferred in less developed countries and tropical climates. However, the well-adopted N-acetylgalactosamine

Received 14 June 2022; accepted 12 September 2022;  
<https://doi.org/10.1016/j.ymthe.2022.09.009>

<sup>†</sup>These authors contributed equally

**Correspondence:** James Heyes, PhD, 155-887 Great Northern Way, Vancouver, BC V5T 4T5, Canada.

**E-mail:** [james.heyes@genevant.com](mailto:james.heyes@genevant.com)

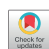

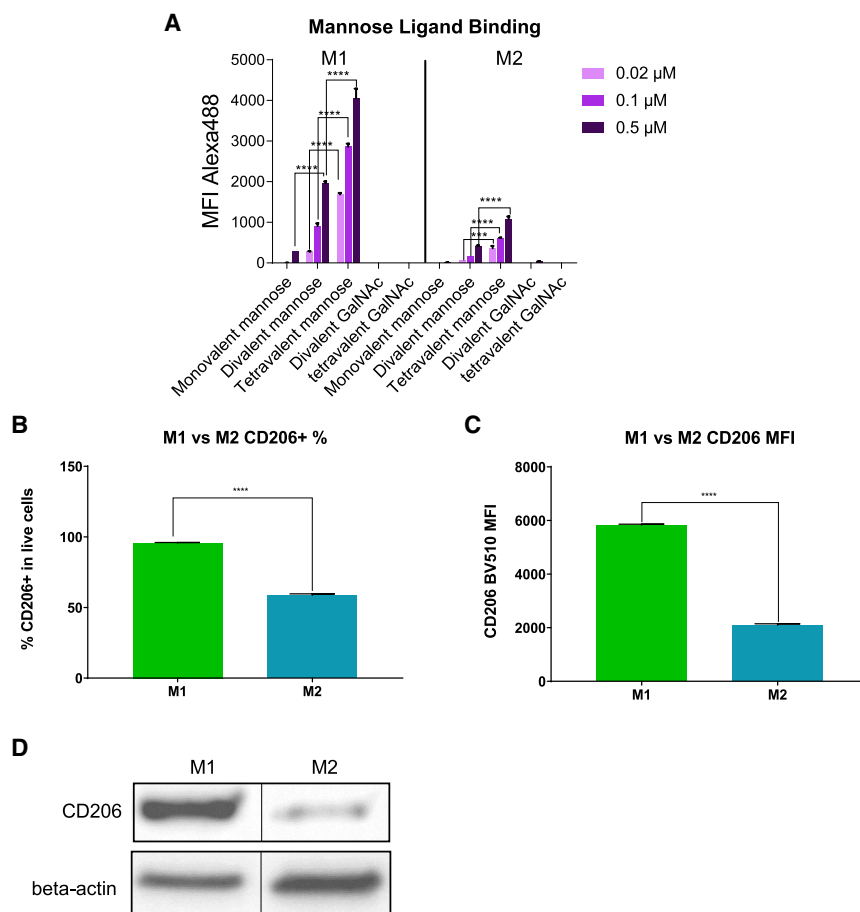

**Figure 1. Binding of mono-, di-, and tetravalent mannose ligands to M1 and M2 macrophages**

(A) Biotinylated mono-, di- or tetravalent mannose ligands were complexed with AF488-labeled streptavidin and incubated with human CD14+ monocyte-derived M1 and M2 macrophages. The mean fluorescence index (MFI) of AF488 was quantified using flow cytometry to determine the binding affinity of each ligand ( $n = 2$ ,  $***p < 0.001$ ,  $****p < 0.0001$ , two-way ANOVA analysis). The error bars represent standard deviation.

(B) Expression of CD206 in M1 was quantified by flow cytometry ( $n = 3$ ,  $****p < 0.0001$ , Welch's  $t$  test). The error bars represent standard deviation.

(C) Expression of CD206 in M2 was quantified by flow cytometry ( $n = 3$ ,  $****p < 0.0001$ , Welch's  $t$  test). The error bars represent standard deviation.

(D) Expression of CD206 on M1 and M2 detected by western blot with beta-actin as a loading control. The blank lanes between the samples were removed to allow better comparison.

100% protection against lethal MARV infection in a guinea pig model.

## RESULTS

### Binding of monovalent and multivalent mannose ligands by human CD14+ monocyte-derived macrophages *in vitro*

To identify a potent mannose ligand for siRNA conjugation, we designed a series of biotinylated mannose ligands with different valencies (mono-, di-, tetravalent) (Figure S1). These ligands

were complexed with Alexa Fluor 488 (AF488)-conjugated streptavidin and incubated with human CD14+ monocyte-derived M1 and M2 macrophages. The binding affinity of each ligand complex was determined by quantification of AF488 fluorescence using flow cytometry. As shown in Figure 1A, dose-dependent increase of AF488 mean fluorescence intensity (MFI) was observed in both M1 and M2 macrophages, indicating ligand binding and cellular uptake. No appreciable binding of divalent or tetravalent GalNAc ligands was observed in either cell type, consistent with the absence of ASGPR expression. This indicated that the detected fluorescence resulted from mannose ligand binding and not passive non-specific fluorescent complex uptake.

In both M1 and M2 cells, the binding activity of mannose ligands correlated positively with valency, with tetravalent ligand showing the highest binding affinity, and monovalent ligand the least (Figure 1A). Similar advantages for multivalent ligands have been reported for GalNAc-siRNA platforms.<sup>25–28</sup> Interestingly, all three mannose ligands showed higher binding affinity to M1 than M2, which is consistent with higher expression of target mannose receptor (CD206) in M1 than M2 differentiated with the current induction protocol (Figure 1B–1D).

(GalNAc)-siRNA conjugates deliver payloads predominantly via the asialoglycoprotein receptor (ASGPR), which is highly expressed on hepatocytes but minimally on other cell types.<sup>19</sup> While this specificity is helpful for hepatocyte-based indications, it limits the ability to treat MARV infection, which affects both hepatocytes and the mononuclear phagocytic system (macrophages, Kupffer cells, and dendritic cells).<sup>5,20,21</sup> A ligand-siRNA conjugate delivery platform that additionally targets these phagocytic cells could potentially address this limitation.

Mannose has been identified as a ligand for CD206 (also known as the mannose receptor) found on the surface of macrophages and immature dendritic cells.<sup>22,23</sup> After binding mannose-rich glycoconjugates, receptor internalization mediated by endocytosis and phagocytosis of the bound ligands occurs in macrophages.<sup>24</sup> Inspired by our GalNAc-siRNA conjugate platform, we developed a multivalent mannose conjugate platform to enable targeted delivery of siRNAs to CD206-expressing macrophages and dendritic cells. *In vitro* gene silencing mediated by mannose-siRNA was demonstrated in human CD14+ monocyte-derived macrophages. Importantly, combination treatment of our GalNAc-siRNA and mannose-siRNA conjugate targeting MARV NP protein conferred

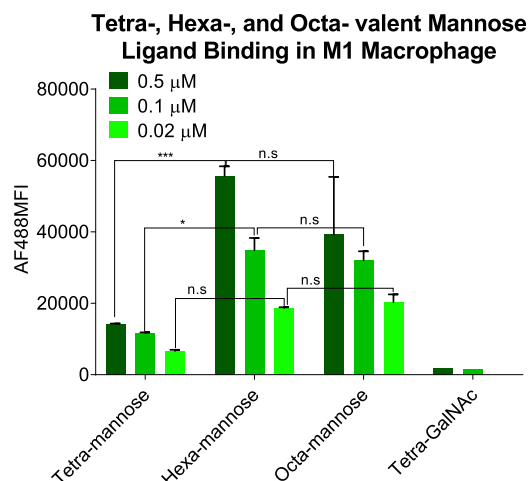

**Figure 2. Binding of tetra-, hexa-, and octa-valent mannose ligands to M1 macrophages**

Biotinylated tetra-, hexa-, or octa-valent mannose ligands were complexed with AF488-labeled streptavidin and incubated with M1 macrophages. The MFI of AF488 was quantified using flow cytometry to determine the binding affinity of each ligand ( $n = 2$ ; \* $p < 0.05$ ; \*\*\* $p < 0.01$ ; n.s.,  $p > 0.05$ , two-way ANOVA analysis). The error bars represent standard deviation.

This prompted us to investigate even higher valencies, and we synthesized and tested the binding affinity of hexa- and octa-valent mannose ligand (Figures S1–S8) against the tetravalent ligand in M1 macrophage. As shown in Figure 2, hexavalent mannose ligand exhibited further increased binding, while increasing to octa-valency appeared to show a slight decrease.

#### Uptake of fluorescent-labeled mannose-siRNA conjugate by macrophage and dendritic cells *in vitro*

To test the efficacy of mannose-enabled siRNA delivery, a chemically modified siRNA targeting mouse CD45 was conjugated with the tetravalent mannose ligand (Figure 3A). The same CD45 siRNA conjugated with a tetravalent GalNAc ligand was employed as a negative control. The conjugates were labeled with cyanine 3 (Cy3) fluorescence to allow visualization and quantification of siRNA uptake. M1 macrophages and HepG2 cells were incubated with the conjugates, and siRNA uptake was analyzed using fluorescent microscopy. Consistent with the ligand binding results, Cy3-tetra-mannose-siRNA successfully delivered to M1 macrophages but not HepG2 cells expressing lower levels of CD206 (Figure 3B). Conversely, Cy3-tetra-GalNAc-siRNA showed uptake by HepG2 cells (which express the ASGPR receptor) but was not detectable in M1 macrophages. We further compared the delivery of Cy3-tetra-mannose-siRNA to Cy3-hexa-mannose-siRNA in M1 cells. Consistent with the ligand binding data, the hexavalent mannose ligand-conjugated siRNA showed higher delivery activity than the tetravalent ligand conjugate (Figure S9).

To demonstrate the involvement of the mannose receptor in conjugate delivery, we conducted a competition binding experiment using D-mannose, a natural ligand for CD206. M1 macrophages were first

incubated with D-mannose or D-galactose before treating with Cy3-tetra-mannose-siRNA. As shown in Figure 3C, competitive binding of D-mannose substantially inhibited uptake of the mannose-siRNA conjugate, illustrated by reduced fluorescence. D-galactose, which is not a ligand for the mannose receptor, showed no competitive binding effect. These results confirmed the involvement of the mannose receptor in mannose-siRNA conjugate delivery to human CD14+ monocyte delivery M1 macrophages.

In addition to macrophages, CD206 is reportedly expressed in dendritic cells (DCs), although expression is substantially reduced upon maturation of these cells.<sup>29–32</sup> We therefore sought to test uptake in both immature DCs (iDCs) and mature DCs (mDCs), again characterizing the effect of ligand valency. M1 and M2 macrophages were included as positive controls. Cells were incubated with Cy3-tetra-mannose-siRNA, Cy3-hexa-mannose-siRNA, or Cy3-tetra-GalNAc-siRNA. The resulting fluorescence was quantified using flow cytometry and indicated effective uptake of Cy3-tetra-mannose-siRNA and Cy3-hexa-mannose-siRNA but not Cy3-tetra-GalNAc-siRNA. Consistent with the ligand binding data and reported receptor expression, both hexavalent and tetravalent mannose-siRNA conjugates showed superior delivery to M1 compared with M2 (Figure 4). Similar delivery selectivity was observed when comparing iDCs with mDCs. Of note, hexa-mannose-siCD45 was more efficient than tetra-mannose-siCD45 in delivering to M1, M2, and iDCs, particularly at the lower dose. These results further confirmed that multivalent mannose conjugates mediate effective uptake in CD206-expressing cells.

#### *In vitro* gene silencing by mannose-siRNA conjugates in M1 macrophage

To investigate whether the ligand binding affinity and conjugate delivery translate to gene silencing activity, we treated M1 macrophages with hexa-mannose-conjugated CD45 siRNA. As endosome release has been reported to be a significant bottleneck in siRNA conjugate delivery, we also supplemented the siRNA treatment with a mannose-conjugated, pH-responsive endosome release polymer (ERP) (Figures S10 and S11) to address this challenge.<sup>28</sup> The same CD45 siRNA conjugates with a tetravalent GalNAc ligand and a GalNAc functionalized ERP were employed as controls. In the absence of ERP, neither GalNAc conjugates nor mannose conjugates enabled any appreciable target gene silencing in the treated cells (Figure 5). Treatment of hexa-mannose-siCD45 in combination with mannose-ERP but not GalNAc-ERP resulted in target gene inhibition in treated M1 macrophages. RNAi activity was not appreciable in the tetra-GalNAc-siCD45 treatment groups, regardless of the presence of GalNAc or mannose-ERP. These results suggest that mannose ligands support, and are indeed critical to, the delivery of both siRNA conjugates and ERP to M1 macrophages. The mannose ligand must be present on both entities to ensure their uptake and concomitant gene silencing.

#### *In vivo* delivery and activity of hexa-mannose-siRNA conjugate

To examine *in vivo* delivery and activity of hexa-mannose-siRNA conjugates, we elicited macrophages in the mouse peritoneal cavity by induction with thioglycolate.<sup>33,34</sup> Animals were then treated with

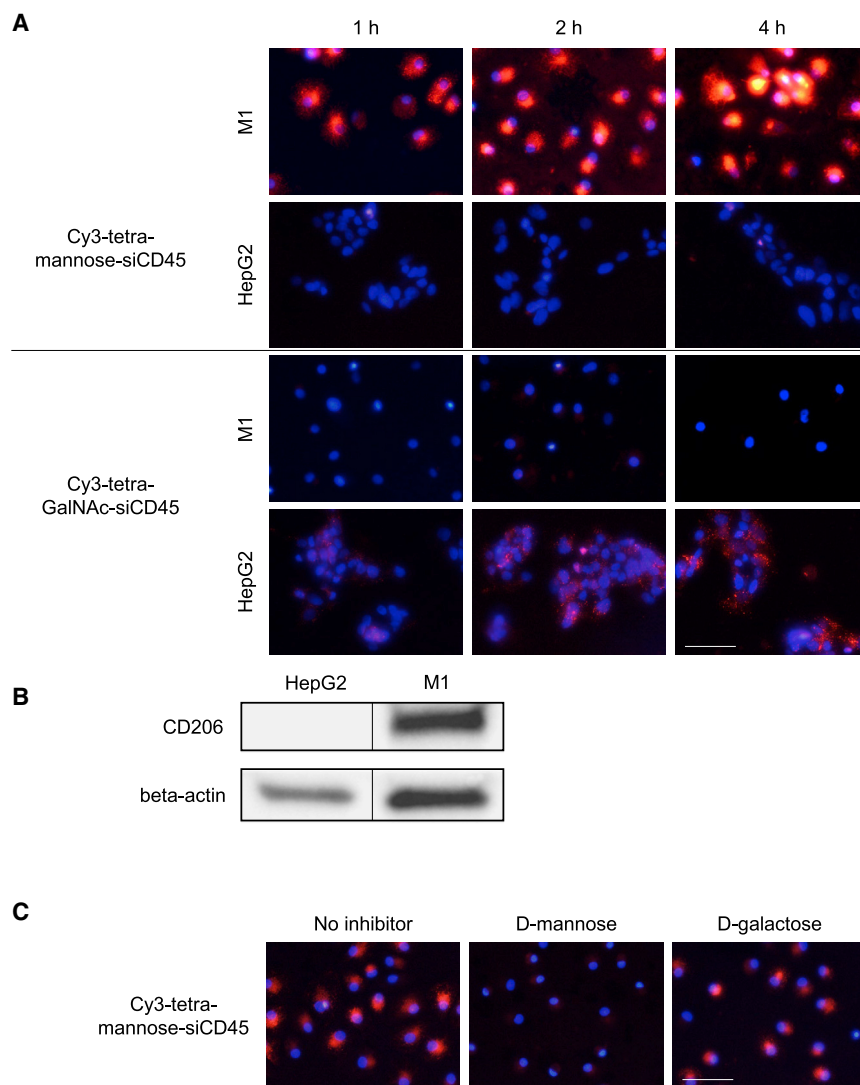

**Figure 3. Uptake of fluorescent-labeled mannose-siRNA conjugate by M1 macrophage**

(A) Cy3-labeled tetra-mannose-siCD45 or tetra-GalNAc-siCD45 were incubated with M1 macrophages or HepG2 cells. The delivery of conjugates was determined by detection of Cy3 fluorescence under a fluorescence microscope. Cell nuclei were stained with DAPI. Scale bar, 100  $\mu$ m.

(B) Expression of CD206 in M1 and HepG2 cells were measured by western blot. The blank lanes between the samples were removed to allow better comparison.

(C) M1 macrophages were treated with D-mannose or D-galactose before incubating with Cy3-tetra-mannose-siCD45. The delivery of conjugates was determined by detection of Cy3 fluorescence under a fluorescence microscope. Cell nuclei were stained with DAPI. Scale bar, 100  $\mu$ m.

hexa-mannose-conjugated siRNA to macrophages in the thioglycolate mouse model.

We further explored the delivery of hexa-mannose-siRNA conjugates to liver macrophages (Kupffer cells) that express CD206.<sup>35</sup> Mice were then treated with a single subcutaneous dose of AF647-labeled hexa-mannose-siCD45 conjugate or unconjugated siCD45 at 3 mg/kg. At 1.5 h post conjugate treatment, liver cells were collected via perfusion and enzymatic digestions and stained with anti-ASGPR and anti-F4/80 to identify hepatocytes and Kupffer cell populations, respectively. The cells were analyzed using flow cytometry to quantify the siRNA delivery. Hexa-mannose-siCD45 and unconjugated siCD45 showed similarly low delivery to hepatocytes and total nonparenchymal cells (NPCs). In Kupffer cells, though, substantially more

accumulation of hexa-mannose-siCD45 (>70%) than unconjugated siCD45 (~30%) was observed. These results demonstrated the delivery of our hexa-mannose-siRNA conjugate to the liver Kupffer cells.

#### Combination treatment of hexa-mannose-siRNA and GalNAc-siRNA demonstrated antiviral potency in a guinea pig virus challenge model

We further evaluated the mannose-siRNA delivery platform in a guinea pig model of MARV (Angola variant) infection.<sup>36</sup> Taking the siRNA sequence targeting MARV NP previously identified for use with LNP delivery,<sup>12</sup> we applied a heavy modification pattern comprising 2' O-methyl (OMe) and fluorine (F) to render it suitable for conjugate delivery.<sup>37</sup> To allow for targeting of both hepatocytes and macrophages/dendritic cells (collectively, the most relevant cell types in MARV infection), we coupled both tetra-GalNAc and hexa-mannose ligands to the siRNA. These conjugates were tested both alone and in combination in the guinea pig MARV infection

fluorescent-labeled (Alexa Fluor 647 [AF647]) hexa-mannose-siCD45 conjugate and mannose-ERP. The peritoneal cells of treated animals were collected at 24 h post treatment and analyzed with flow cytometry with AF647 for siRNA delivery and CD45 for gene silencing activity. As shown in Figure 6A, fluorescence was detected in >80% CD206+ peritoneal macrophages in AF647-hexa-mannose-siCD45-treated animals, regardless of the presence/absence of mannose-ERP. This compares with ~50% delivery to the CD45+ cells, and the majority (~80%) of CD45+ cells with conjugate delivery were also CD206+ (Figure S12). The delivered siCD45 enabled a trend of target gene silencing in both groups, with the mannose-ERP showing a slight benefit to RNAi activity (Figure 6B), but neither treatment achieved statistically significant gene knockdown. We hypothesized that the expression of CD206 in these thioglycolate-elicited peritoneal macrophages was not high enough to allow sufficient siRNA conjugate and/or ERP uptake. Nonetheless, these results demonstrate successful delivery of

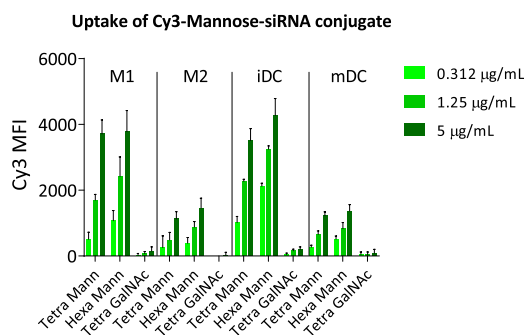

**Figure 4. Uptake of fluorescent-labeled mannose-siRNA conjugate by macrophages and dendritic cells**

Cy3-labeled hexa-mannose-siCD45, tetra-mannose-siCD45, or tetra-GalNAc-siCD45 were incubated with M1, M2, iDC, or mDC derived from human CD14<sup>+</sup> monocytes. The MFI of Cy3 was quantified using flow cytometry to determine the uptake of each conjugate. The error bars represent standard deviation.

model. Animals were challenged with a lethal dose of MARV and treated with conjugates at 24 h post infection. As shown in Figure 7A, unconjugated siMARV, tetra-GalNAc-siMARV, or hexa-mannose-siMARV treatment alone provided no appreciable protection against virus-induced mortality when dosed at 10 mg/kg/day for 7 days. Combination treatment of tetra-GalNAc-siMARV (5 mg/kg, once per day (QD)) and hexa-mannose-siMARV (5 mg/kg, QD) for 7 days substantially improved the survival rate to 60%, accompanied with reduced viremia and improved clinical scores (Figure S13). We also explored the effect of ERPs in this study by supplementing the treatment with GalNAc-ERP (5 mg/kg) and mannose-ERP (5 mg/kg) on the first day of conjugate treatment immediately after injection of siRNA conjugates. Combination of ERP showed no further improvement on the survival or viremia in the challenged animals, which could be due to suboptimal dosing levels or regimen. To optimize the dosing regimen, we performed a second study to further compared a daily dosing schedule with weekly and single dose at 5 mg/kg total siRNA starting from 24 h post infection. Consistent with the first study, the GalNAc/mannose conjugate combination treatment again provided superior protection compared with the GalNAc conjugate alone, in both daily and weekly dosing regimens (Figures 8A and S14). In particular, the daily dosing group with 5 mg/kg of total GalNAc/mannose conjugate (1:1) achieved 100% survival with no clinical sign of disease. The viremia and body weight data agreed well with the animal survival results (Figures 8B and 8C). We did not test ERP in this study as it would require further optimization on conjugate dosing regimen. Together, the mannose/GalNAc combination ligand platform appears to offer superior protection in the MARV guinea pig model, a fact we currently ascribe to effective delivery of siRNA to all relevant cell types.

## DISCUSSION

RNAi therapeutics have demonstrated potential in addressing a variety of diseases and viral infections. They act by degrading specific targeted mRNA transcripts and silence the downstream expression of encoded proteins. Synthetic siRNAs are common RNAi triggers

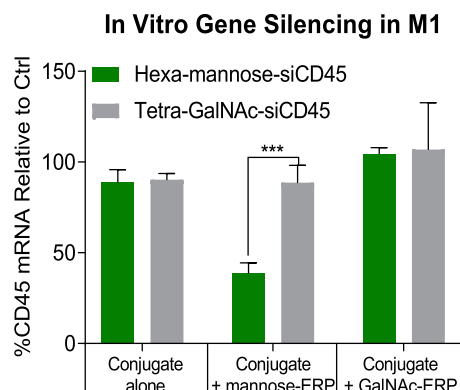

**Figure 5. In vitro gene silencing by mannose-siRNA conjugates in M1 macrophages**

M1 macrophages were treated with 20 µg/mL of hexa-mannose-siCD45 or tetra-GalNAc-siCD45 either alone or in combination with 100 µg/mL of mannose- or GalNAc- ERP. Cell lysates were collected at 24 h post conjugate treatment and the target gene silencing activity was assessed by quantification of mRNA with QuantiGene assay (n = 3, \*\*\*p < 0.01, two-way ANOVA analysis). The error bars represent standard deviation.

composed of two RNA oligonucleotides that are complementary in sequence and form a duplex. They are designed to enable post-transcriptional gene suppression through sequence-specific degradation of the selected target mRNA. The first approved RNAi product used an LNP delivery system for delivery of an siRNA targeting the transthyretin (*Ttr*) gene.<sup>15</sup> This delivery platform has also achieved high efficacy in MARV infection in preclinical studies.<sup>12,13</sup> However, the requirement of intravenous (i.v.) dosing, and, to a lesser degree, cold chain storage make the platform's use more challenging in developing countries where MARV infection is still endemic. A ligand-siRNA conjugate format would be preferable for this indication, given its subcutaneous administration route and higher thermo-stability than LNP-siRNA. Widely used GalNAc-siRNA platforms are limited to hepatocyte targeting, while MARV infection affects multiple cell types in addition to hepatocytes, such as macrophages and dendritic cells. Development of a ligand-siRNA conjugate platform that would additionally access these cells is thus desirable.

Mannose receptor (CD206) is a membrane lectin primarily expressed in macrophages and dendritic cells.<sup>22,38–40</sup> It recognizes a range of carbohydrates presented on the surfaces of pathogens and thus plays a role in immune recognition. Compared with other ligands, such as peptides and antibodies for targeting macrophages and dendritic cells,<sup>41,42</sup> mannose is a natural ligand for CD206 and has been utilized for conjugation with small molecules and functionalizing nanoparticles for macrophage-targeting delivery.<sup>43–50</sup> Here, we applied our experience in developing GalNAc-siRNA conjugates to establish a mannose-siRNA conjugate delivery platform.<sup>28</sup> We synthesized a range of mannose ligands and demonstrated that binding affinity generally increased with valency, with a hexavalent ligand having the highest. This advantage in multivalency agrees with the previous finding in GalNAc ligands, but the underlying mechanism could be

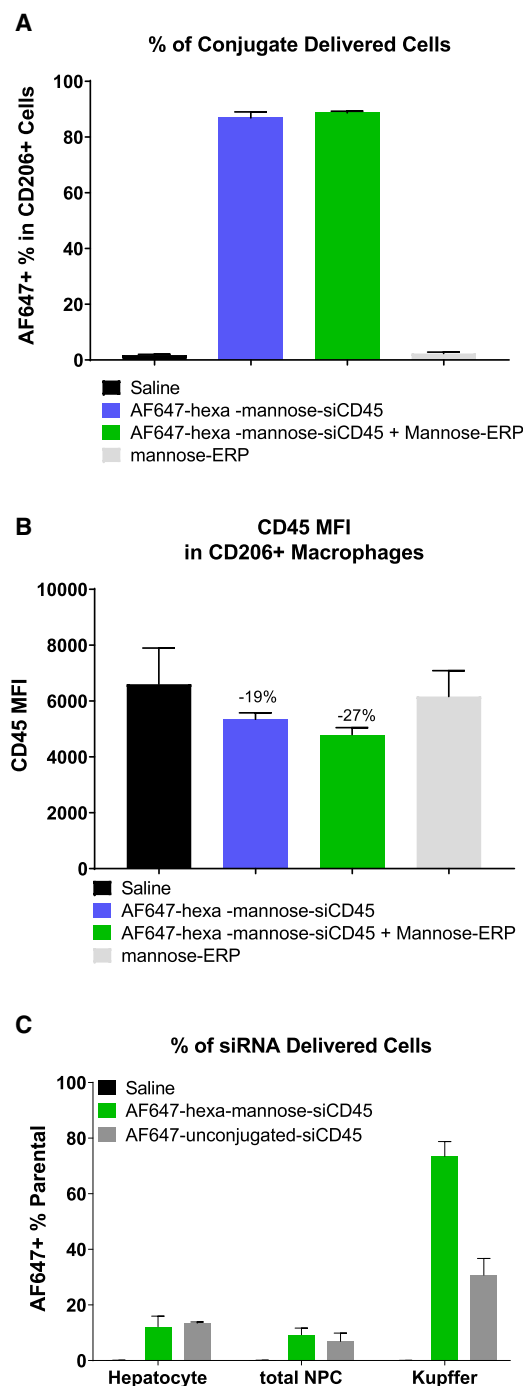

**Figure 6. In vivo delivery and activity of hexa-mannose-siRNA conjugate**

(A and B) C57BL/6 female mice ( $n = 4$ ) were induced with 4% thioglycolate to elicit peritoneal macrophages. Animals were injected subcutaneously with a single dose of vehicle control (saline), AF647-hexa-mannose-siCD45 (10 mg/kg), AF647-hexa-mannose-siCD45 (10 mg/kg) + mannose-ERP (50 mg/kg), or mannose-ERP alone (50 mg/kg). The peritoneal cells of treated animals were collected at 24 h post siRNA and ERP treatment and analyzed with flow cytometry for the delivery of siRNA conjugate (AF647 fluorescence, A) and target gene silencing (CD45, B). (C) Female Balb/c mice ( $n = 4$ ) were injected subcutaneously with a single dose of vehicle

partially different. The GalNAc-targeted receptor ASGPR is formed from two carbohydrate recognition domains with a dominant trimeric configuration.<sup>25–27</sup> Thus, ligand multivalency allows increased interaction with the receptor. CD206, on the other hand, is a monomeric receptor with one major domain (C-type lectin-like domain-4, CTLD4) for mannose binding.<sup>40</sup> It is possible that the multivalent mannose ligands would trigger some clustering effect of the receptor on the cell membrane surface and improve uptake.<sup>51</sup> A detailed account of how multivalency affects the binding of mannose ligands has yet to be elucidated.

Receptor expression level is one of the key factors affecting delivery efficiency. We compared CD206 expression in M1 versus M2 macrophages differentiated from human CD14+ monocytes using a previously reported protocol.<sup>52</sup> To our surprise, in contrast to results in other reports,<sup>53–55</sup> M1 macrophages differentiated in this study expressed higher levels of CD206 than M2. Of note, macrophage activation resulted in a spectrum of heterogeneous cell populations, and the gene expression profiles are substantially influenced by the differentiation protocol.<sup>56–58</sup> For example, the Roche CellXVivo human M1 macrophage differentiation kit could also induce CD206+ M1 macrophages from human CD14+ monocytes. Importantly, CD206 expression levels in our M1 and M2 cells were in accordance with the binding affinity of mannose ligands and uptake of mannose-siRNA conjugates. Similarly, uptake of mannose-siRNA conjugates was more effective in iDCs than mDCs, consistent with the reported CD206 expression level.<sup>29–32</sup> These results indicated that delivery of mannose-siRNA conjugate was mediated by the CD206 receptor, which was further confirmed with our ligand competition experiment.

Endosomal escape is a major bottleneck for siRNA conjugate activity, and previous studies have shown the majority of delivered GalNAc-siRNA remains trapped in these cellular compartments, although sufficient material can reach the cytoplasm to mediate RNAi. The precise mechanics of this process have not been fully elucidated.<sup>59</sup> This results in the requirement for high doses of GalNAc-siRNA to provide sufficient activity. We previously reported that co-administering a GalNAc functionalized ERP micelle provides markedly higher gene silencing potency in GalNAc-siRNA-treated animals.<sup>28</sup> This polymer is capable of forming small micelle structures spontaneously in aqueous media when reaching the critical micelle concentration (CMC). When entering an endosome with an acidic pH environment, the polymer micelle will be protonated and trigger endosomal membrane destabilization to promote siRNA conjugate escape. This strategy could be essential for extrahepatic cell targeting where the receptors are expressed at a

control (saline), AF647-hexa-mannose-siCD45 (3 mg/kg), or AF647-unconjugated-siCD45 (3 mg/kg). The single cells were isolated from the mouse livers at 1.5 h post siRNA treatment and analyzed with flow cytometry for the delivery of siRNA conjugate (AF647 fluorescence). Cells were also stained with ASGPR and F4/80 to identify the hepatocyte and Kupffer cell populations, respectively. The error bars stand for standard error of mean (SEM).

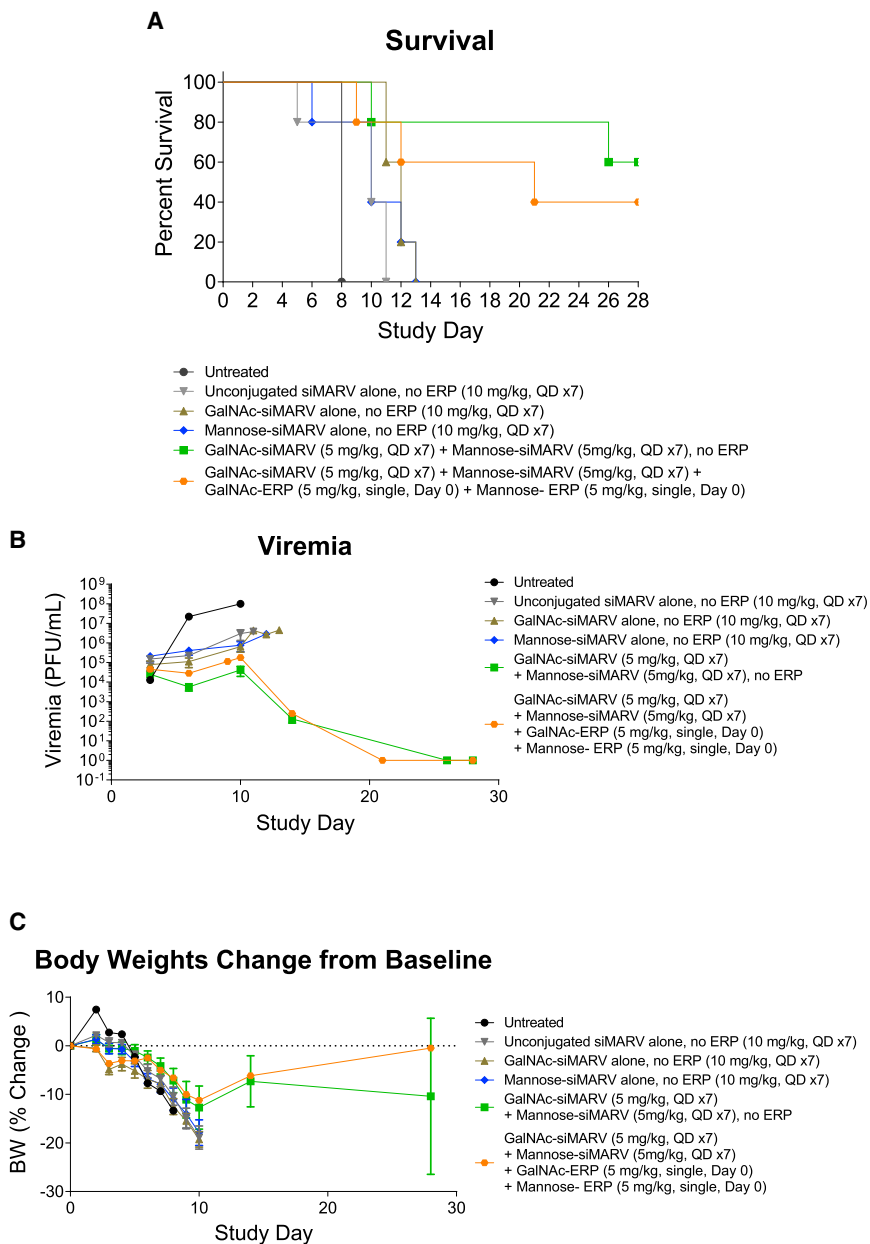

**Figure 7. Daily dosing of GalNAc- and mannose-conjugated anti-MARV siRNA reduced MARV-induced mortality in guinea pig**

Guinea pigs ( $n = 5$  for conjugate treatment group,  $n = 1$  for untreated group) were challenged with a lethal dose of MARV Angola strain. Twenty-four hours post viral exposure, animals were subcutaneously injected with unconjugated siMARV, tetra-GalNAc-siMARV, hexa-mannose-siMARV alone, combination of tetra-GalNAc-siMARV + hexa-mannose-siMARV (1:1) (10 mg/kg total siRNA, mixed in one vial; daily dosing, seven doses). In one group, treatment of tetra-GalNAc-siMARV + hexa-mannose-siMARV (1:1) (10 mg/kg total siRNA, mixed in one vial; daily dosing, seven doses) was immediately followed with GalNAc-ERP + mannose-ERP (1:1) (10 mg/kg total ERP, mixed in one vial, single subcutaneous dose on the first day of conjugate treatment). The antiviral efficacy was evaluated by survival rates (A), viremia (B), and body weights (C). The error bars stand for standard error of mean (SEM).

of mannose conjugates to these cells was achieved, although gene silencing activity was not appreciable. Even with the addition of the mannose-ERP, activity was not significantly improved. This is not entirely unexpected since peritoneal macrophages are known to express low levels of CD206.<sup>60</sup> Low expression of target receptor may not support uptake of both mannose-siRNA and mannose-ERP. We also demonstrated delivery of mannose-siRNA conjugates to the liver Kupffer cells, which are liver-resident macrophages.

Results in a guinea pig model of MARV infection were considerably better. Hepatocytes, monocytes, and macrophages are all known to be infected by the virus, the latter cells becoming activated in the process.<sup>61</sup> As expected, targeting the virus in these cell types individually with hepatocyte-targeting GalNAc-siRNA, or macrophage/DC-targeting mannose-siRNA treatment, does not provide full protection against

lower level or ligand binding is less efficient. During the investigation of RNAi activity of our mannose-siRNA conjugates *in vitro*, we observed successful uptake in macrophages without appreciable gene silencing when treated with conjugate alone. The lack of activity was successfully addressed by combination treatment of mannose-ERP. It is notable that both the siRNA *and* the ERP had to be derivatized with mannose to observe activity, suggesting that delivery of both entities is mediated by the mannose receptor.

Encouraged by the *in vitro* delivery and activity results, we tested the mannose conjugate platform *in vivo*. In a murine model where thioglycolate is used to elicit peritoneal macrophages, successful delivery

the infection. Although some level of viremia reduction was observed in both single-treatment arms, combination of the two platforms rendered the most effective protection, consistent with the concept of targeting the virus in all relevant cell populations.<sup>5,20,21</sup> We also observed better protection from the 5-mg/kg daily dosing regimen than the 10-mg/kg daily dosing regimen. This could be explained by the MARV virus compromising liver function during infection, which in turn is likely to be sensitive to an aggressive dosing regimen with high siRNA dose burden. This may also explain why no benefit was appreciated when supplementing the treatment with GalNAc-ERP and mannose-ERP. Indeed, weekly dosing of mannose-siRNA and GalNAc-siRNA combination at 5 mg/kg also provides reasonably

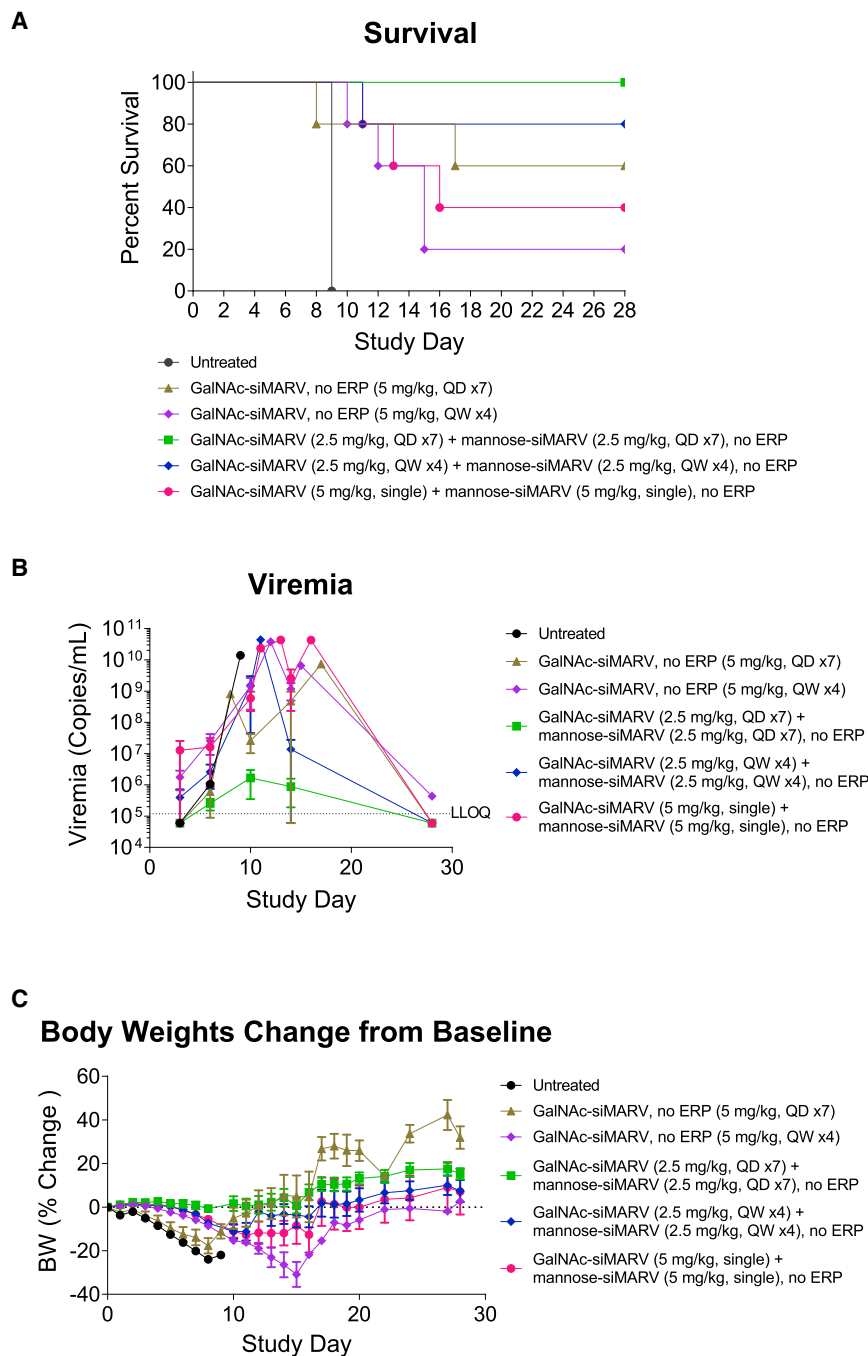

good therapeutic benefit. Further optimization of dosing regimen and evaluation of impacts to liver function in the context of treated infection are the focus of ongoing work. We are also planning to combine our RNAi approach with other anti-MARV treatments to improve the therapeutic effect.<sup>62</sup>

Our mannose-siRNA delivery platform offers therapeutic potential in other indications involving macrophages and DCs. For example,

#### Figure 8. Effect of dosing regimen of anti-MARV GalNAc and mannose-conjugated siRNA in guinea pig model

Guinea pigs ( $n = 5$  for conjugate treatment group,  $n = 1$  for untreated group) were challenged with a lethal dose of MARV Angola strain. Twenty-four hours post viral exposure, animals were treated with tetra-GalNAc-siMARV alone or in combination with hexa-mannose-siMARV (1:1) (5 mg/kg total siRNA; daily subcutaneous dosing, seven doses, or weekly subcutaneous dose, four doses). One group with a single 10-mg/kg total siRNA dose of combination GalNAc and mannose conjugates was also tested. The antiviral efficacy was evaluated by survival rates (A), viremia (B), and body weights (C). The error bars stand for standard error of mean (SEM).

macrophages play an essential pathological role in rheumatoid arthritis,<sup>63–65</sup> Kupffer cells (liver macrophages) are actively involved in multiple liver diseases and liver injury,<sup>66</sup> and macrophages are also an essential factor in cancer pathogenesis.<sup>67</sup> Our subcutaneously administered macrophage/DC-targeting delivery platform potentially allows siRNA conjugates to be redirected to address these challenging diseases.

## MATERIALS AND METHODS

### Synthesis of mannose and GalNAc ligands

The ligands utilized in this manuscript were prepared using established organic chemistry techniques, including purification by automated flash chromatography and product confirmation with a combination of analytical high-pressure liquid chromatography (HPLC), liquid chromatography-mass spectrometry (LC-MS), mass spectrometry (MS), and proton nuclear magnetic resonance spectrometry (NMR) as appropriate. Complete synthetic protocols for all ligands contained in this manuscript can be found in the supplemental information.

### Synthesis of mannose-conjugated and GalNAc-conjugated siRNAs

For sense strand synthesis, ligand succinates (Figure S8) were loaded onto 1,000 long-chain aminoalkyl controlled pore glass (CPG) using standard amide coupling chemistry. Loading was determined by Dimethoxytrityl (DMTr) assay at UV-visible (UV-vis) 504 nm. The resulting GalNAc- or mannose-loaded CPG solid support was employed in automated oligonucleotide synthesis using standard procedures. Nucleotide deprotection followed by removal from the solid support (with concurrent galactosamine acetate deprotection) afforded the GalNAc- or mannose-oligonucleotide conjugate (Figure S2). In



some cases, fluorescent (Cy3 or AF647) labeling was conducted at the 5' end of the sense strand.

For antisense strand synthesis and duplex formation, antisense strands were prepared by automated oligonucleotide synthesis using standard procedures. Nucleotide deprotection followed by removal from the solid support afforded the deprotected antisense strand. Annealing of the sense and antisense strands using standard techniques afforded siRNA conjugates.

The CD45 siRNA sequences are cited from the 5' to 3' end as follows:

Sense strand: mC\*mUmGmGfCmUfGfAfAmUmUmUmCmAmGmAmGmC\*mA.

Antisense strand: mU\*fG\*mCmUmCfUmGfAfAmAmUmUmCfAmGfCmCmAmG\*mU\*mU.

2'-O-methyl nucleotides are depicted as "m" + UPPER CASE; 2'-Fluoro nucleotides are depicted as "f" + UPPER CASE. Phosphorothioate linkers are depicted as "\*".

The MARV siRNA sequences are cited from the 5' to 3' end as follows:

Sense strand: mG\*mA\*mUmUmCmUfCmAfGfGfAmCmUmUmCmUmUmAmUmUmA

Antisense strand: mU\*fA\*mAmUmAfAmGfAfAmGmUmCmCfUmGfAmGmAmAmUmC\*mU\*mA.

#### Mannose and GalNAc biotin ligand preparation

Biotinylated ligands were prepared according to procedures outlined in the supplemental data (Figures S1 and S7).

#### Mannose- and GalNAc-targeted ERP synthesis and micelle preparation

Polymers were synthesized by Syngene International using synthetic methodology analogous to that previously described (Figure S10).<sup>68</sup> The polymer was dissolved in 10 mM phosphate/200 mM sucrose PBS (pH 7), up to 40 mg/mL followed by successive filtration (three or four times) through a 0.2- $\mu$ m sterile filter. This produced stable polymer micelles with an approximate particle diameter of 15 nm and polydispersity of <0.16.

#### HepG2 cell culture

HepG2 cells (ATCC, Manassas, VA) were propagated as monolayers in 175-cm<sup>2</sup> culture flasks at 37°C in a humidified atmosphere containing 5% CO<sub>2</sub>, using Minimum Essential Medium (MEM) (Thermo Fisher Scientific, Waltham, MA) supplemented with 10% fetal bovine serum (FBS), 100 U/mL penicillin and 100  $\mu$ g/mL streptomycin, 2 mM L-glutamine, 1 mM sodium pyruvate, 1 $\times$  non-essential amino acids, and 0.15% sodium bicarbonate. All components were from Thermo Fisher Scientific (Waltham, MA).

#### Differentiation of M1, M2, iDC, and mDC from human CD14+ monocytes

Human Buffy coat was purchased from BioIVT. CD14+ monocytes were isolated from buffy coat using the StraightFrom Buffy Coat CD14 MicroBead Kit (Miltenyi Biotech, Auburn, CA) following the manufacturer's protocol. The isolated CD14 monocytes were differentiated to M1 and M2 macrophages following a previously published protocol.<sup>52</sup> In brief, monocytes were cultured in RPMI medium containing 10 mM HEPES, 2 mM L-glutamine, and 10% FBS. To trigger M1 macrophage differentiation, cells were stimulated with 50 ng/mL granulocyte-macrophage colony-stimulating factor (GM-CSF) on days 0 and 3 and further induced with 50 ng/mL interferon (IFN)- $\gamma$  on day 6. For M2 macrophage differentiation, cells were treated with 50 ng/mL macrophage colony-stimulating factor (M-CSF) on day 0 and 3 and further induced with 20 ng/mL interleukin (IL)-4 in combination with 20 ng/mL IL-10 on day 6. Differentiated M1 and M2 were tested for ligand binding on day 7. iDC differentiation was stimulated with treatment of 500 U/mL GM-CSF + 1,000 U/mL IFN $\alpha$ 2b on day 0 and day 3. mDC differentiation was triggered with treatment of 500 U/mL GM-CSF + 1,000 U/mL IFN $\alpha$ 2b on day 0 and 500 U/mL GM-CSF + 1,000 U/mL IFN $\alpha$ 2b + 1  $\mu$ g/mL LPS in combination with 1  $\mu$ g/mL LPS on day 3. iDCs and mDCs were collected on day 5 for conjugate delivery test. All components were from Thermo Fisher Scientific (Waltham, MA).

#### Receptor binding assay

Biotinylated mannose ligands were reconstituted in dimethyl sulfoxide (DMSO) (Sigma, St. Louis, MO) and functionalized by incubating with Alex Fluor 488-labeled streptavidin (Thermo Fisher Scientific, Waltham, MA) in Tyrode buffer (containing 10 mM HEPES, 5.6 mM glucose, 10 mM KCl, 35 mM NaCl, 0.4 mM MgCl, 1.0 mM CaCl<sub>2</sub>, and 0.1% BSA, pH 7.3) at 4°C overnight at a molar ratio of 4.5:1 of biotinylated ligands to biotin binding sites.

M1 and M2 macrophages were washed with Dulbecco's PBS (DPBS) (Thermo Fisher Scientific, Waltham, MA) containing 2 mM EDTA (Thermo Fisher Scientific, Waltham, MA), resuspended in ice-cold Tyrode buffer, and seeded into sterile V-bottom 96-well plates (40,000/well). The previously prepared biotin-mannose/AF488-streptavidin complex was diluted in Tyrode buffer and mixed with the seeded macrophages to reach final concentrations of 0.5, 0.1, and 0.02  $\mu$ M (based on streptavidin molar concentration). Biotin-GalNAc/AF488-streptavidin complex was included as control treatment. The cells were incubated with the mannose ligand complexes at 4°C for 1.5 h. After incubation, the cells were washed three times with ice-cold DPBS to remove any unbound ligand complex. After centrifuging at 1,200 rpm for 5 min, the cell pellet was resuspended in stain buffer prior to flow cytometry analysis.

#### Treatment of Cy3-labeled tetravalent mannose or GalNAc-siRNA conjugates for microscopy analysis

M1 macrophages or HepG2 cells were seeded into sterile four-well chamber slides at 80,000 cells/well and 40,000 cells/well in OptiMEM medium (Thermo Fisher Scientific, Waltham, MA),

respectively. Cells were cultured at 37°C after seeding. siRNA conjugate treatment was conducted at 10 min post M1 macrophage seeding and 48 h post HepG2 cell seeding. HepG2 cells were washed with 1 mL of OptiMEM before treatment. Each was supplemented with Cy3-tetra-mannose-siCD45 or Cy3-tetra-GalNAc-siCD45 to reach the final concentration of 5 µg/mL in OptiMEM medium. The cells were incubated with the siRNA conjugate for 1, 2, or 4 h. The cells were then washed with PBS three times and fixed with 4% paraformaldehyde (PFA) (Sigma, St. Louis, MO) for 10 min at room temperature. The chambers were removed from the slides and cells mounted with one drop of mounting medium containing DAPI (4',6-diamidino-2-phenylindole) staining (Thermo Fisher Scientific, Waltham, MA) for the nuclei. The slides were analyzed under a fluorescence microscope.

#### Competitive binding assay

Human M1 macrophages were seeded into sterile four-well chamber slides at 75,000 cells/well in OptiMEM medium. OptiMEM containing D-mannose or D-galactose was added onto testing cells to reach the final concentration of 139 mM and incubated at 37°C for 5 min. Cells were then treated with Cy3-tetra-mannose-siCD45 in OptiMEM with a final concentration of 5 µg/mL and incubated for 1 h. The cells were then washed with DPBS three times and fixed with 4% PFA for 10 min at room temperature. The chambers were removed from the slides and the cells were mounted with one drop of mounting medium containing DAPI staining for the nuclei. The slides were covered, sealed, and analyzed under fluorescence microscope.

#### Treatment of Cy3-labeled tetravalent mannose or GalNAc-siRNA conjugates for flow cytometry analysis

M1 macrophages, M2 macrophages, iDCs, or mDCs were seeded into sterile U-bottom 96-well plates at 22,500 cells/well in OptiMEM medium. Cells were treated with Cy3-hexa-mannose-siCD45, Cy3-tetra-mannose-siCD45, or Cy3-tetra-GalNAc-siCD45 at final concentrations of 5, 1.25, or 0.312 µg/mL in OptiMEM medium. At 1 h post treatment, cells were washed with DPBS three times and resuspended in stain buffer for flow cytometry analysis.

#### Flow cytometry analysis

Analyses were performed on a FACSCanto II using the software FACS Diva (Becton Dickinson, San Jose, CA, United States). As a marker for viability, cells were stained with Live/Dead red or green (Thermo Fisher Scientific, Waltham, MA). The forward scatter and side scatter gate were set to include all viable cells.

When quantification of CD206 and CD45 expression was required, cells were stained with phycoerythrin (PE)-conjugated rat anti-mouse CD45 antibody (BD Biosciences, Franklin Lakes, NJ), BV510-conjugated mouse anti-human CD206 antibody (BD Biosciences, Franklin Lakes, NJ), or APC-eFluor780-conjugated rat anti-mouse CD206 antibody (Thermo Fisher Scientific, Waltham, MA) before flow cytometry analysis. In brief, collected cells (from cell culture or animals) were washed and stained with Live/Dead red or green for 30 min, washed with PBS, blocked with Fc Block (CD16/21) (BD Biosciences,

Franklin Lakes, NJ), and then stained with desired antibodies for 20 min before flow cytometry analysis.

Approximately 10,000–15,000 cells were counted for each sample. The expression of target receptor or genes and the binding/uptake of fluorescent-labeled ligands/conjugates were determined as increased intensity in the corresponding fluorescent channel. For biotin ligand complex binding analysis, the MFI of cells incubated with functionalized streptavidin minus the MFI of cells incubated without functionalized streptavidin (free fluorophore only) was used to determine binding/uptake.

#### Treatment of siRNA conjugate and ERP in M1 macrophages

M1 macrophages were seeded into sterile 96-well plates (15,000/well) and incubated with 20 µg/mL of hexa-mannose-siCD45 or tetra-GalNAc-siCD45 for 4 h at 37°C. Mannose-ERP and GalNAc-ERP were then added to the culture at the concentration of 100 µg/mL. At 24 h post siRNA treatment, cells were lysed with QuantiGene Lysis Mixture (Thermo Fisher Scientific, Waltham, MA) for gene expression quantification.

#### QuantiGene branched DNA assay

To evaluate gene silencing activity, cell lysates collected after the siRNA treatment were subject to QuantiGene branched DNA assay (Thermo Fisher Scientific, Waltham, MA) according to the manufacturer's protocol. In brief, cell lysates were incubated with capture probes targeting mouse *Cd45* (target gene) and *Gapdh* (endogenous control) mRNAs at 55°C for 18–20 h. After washing, the plates were incubated with pre-amplification probes and amplification probes to amplify the signal. The excessive probes were then washed off and assay substrates were added to allow quantifying luminescence using a plate reader. The signal from *Cd45* was normalized to the signal from *Gapdh*.

#### Preparation of mannose conjugates and endosomal release polymer for subcutaneous injection in mice and nonhuman primates

Mannose-siRNA conjugates were dissolved in sterile saline to a concentration of 10 mg/mL for subcutaneous injection. Polymer micelles were prepared as described above. Test articles were diluted to desired concentration and supplied in a single vial for combination treatment.

#### Assessment of mannose-siRNA and polymer micelle in mouse via subcutaneous administration

All animal-related procedures were conducted at Genevant Sciences Corporation, an accredited facility, according to written operating procedures, in accordance with Canadian Council on Animal Care (CCAC) Guidelines on Good Animal Practices and approved by the local Institutional Animal Care and Use Committee (IACUC). Rodent studies were performed under AUP #0618002.

C57BL/6 female mice aged 6–8 weeks (n = 4 per group) were injected intraperitoneally with 1 mL/animal of 4% thioglycolate (Sigma, St. Louis, MO) in distilled water to elicit macrophages in the peritoneum.

Three days post thioglycolate stimulation, animals were injected subcutaneously in the scapular region with a single dose of vehicle control (saline), AF647-hexa-mannose-siCD45 (10 mg/kg), AF647-hexa-mannose-siCD45 (10 mg/kg) + mannose-ERP (50 mg/kg), or mannose-ERP alone (50 mg/kg), using a volume of 5 mL/kg body weight. The peritoneal cells of treated animals were collected at 24 h post siRNA and ERP treatment and analyzed with flow cytometry for siRNA delivery (AF647) and expression of CD206 and CD45.

For testing delivery of siRNAs to liver Kupffer cells. Balb/c female mice aged 6–8 weeks (n = 4 per group) were injected subcutaneously in the scapular region with a single dose of vehicle control (saline), AF647-hexa-mannose-siCD45 (3 mg/kg), or AF647-unconjugated siCD45. Single liver cells were collected using a protocol adapted from a previous publication.<sup>69</sup> In brief, we used two-step *in situ* pronase/collagenase perfusion to dissociate the liver cells followed by *in vitro* digestion with pronase/collagenase solution. The collected single liver cells were centrifuged at  $50 \times g$  for 3 min to separate the hepatocytes and nonparenchymal NPCs. Hepatocytes were stained with anti-ASGPR antibodies (Thermo Fisher) followed by staining of PE-labeled secondary antibody (Thermo Fisher). NPCs were stained with PE-vio770-labeled anti-F4/80 antibody (Miltenyi). The siRNA delivery (AF647) and ASGPR and F4/80 expression were analyzed by flow cytometry.

#### Assessment of GalNac-siRNA and mannose-siRNA in guinea pig MARV infection model

Guinea pigs (n = 5 per group) were injected intraperitoneally with 5,000 pfu/animal of guinea pig-adapted MARV (Angola variant).<sup>36</sup> Twenty-four hours post viral exposure, animals were injected subcutaneously in the scapular region with tetra-GalNac-siMARV or hexa-mannose-siMARV alone or in 1:1 combination (with the same total siRNA dose, mixed in the same vial for injection). Different dosing regimens, such as 10 mg/kg total siRNA daily subcutaneous dosing  $\times$  7 doses, 5 mg/kg total siRNA daily subcutaneous dosing  $\times$  7 doses, 5 mg/kg total siRNA weekly subcutaneous dose  $\times$  4 doses, or a single 10-mg/kg total siRNA dose were also tested (Figures S13 and S14). In one study (Figure S13), animals were also treated subcutaneously with GalNac-ERP (5 mg/kg) together with mannose-ERP (5 mg/kg) (mixed in the same vial for injection) on the first day of conjugate dosing (dosing immediately after conjugate injection). The antiviral efficacy was evaluated by bodyweights, survival rates, and viremia. Guinea pigs were monitored daily and scored for disease progression with an internal MARV humane endpoint scoring sheet approved by the University of Texas Medical Branch (UTMB) IACUC. UTMB facilities used in this work are accredited by the Association for Assessment and Accreditation of Laboratory Animal Care International and adhere to principles specified in the eighth edition of the Guide for the Care and Use of Laboratory Animals (National Research Council).

#### SUPPLEMENTAL INFORMATION

Supplemental information can be found online at <https://doi.org/10.1016/j.ymthe.2022.09.009>.

#### ACKNOWLEDGMENTS

The authors would like to thank the Genevant animal facility and UTMB Animal Resource Center for husbandry support of laboratory animals. The authors would like to thank Ms. Brittany Fransaw for her support with the guinea pig studies. This study was supported by the National Institutes of Health (NIH) grant U19AI142785. Operations support of the Galveston National Laboratory was supported by NIH grant UC7AI094660.

#### AUTHOR CONTRIBUTIONS

X.Y., R.H., and J.H. designed the experiments and wrote the manuscript. R.H. and M.W. designed and synthesized the ligands. E.S. conducted the ligand binding studies. L.P. conducted the conjugate delivery and *in vitro* activity studies. X.Y., C.P., and K.M. conducted the rodent conjugate delivery studies. R.W.C. and V.B. performed the guinea pig activity studies. J.H. and T.W.G. provided experimental and strategic guidance.

#### DECLARATION OF INTERESTS

Some authors are employees or consultants of Genevant Sciences Corporation as noted in the author affiliations and own shares or stock options in their respective companies.

#### REFERENCES

- Iannetta, M., Di Caro, A., Nicastrì, E., Vairo, F., Masanja, H., Kobinger, G., Mirazimi, A., Ntoumi, F., Zumla, A., and Ippolito, G. (2019). Viral hemorrhagic fevers other than ebola and lassa. *Infect. Dis. Clin. North Am.* 33, 977–1002.
- Geisbert, T.W., and Jahrling, P.B. (2004). Exotic emerging viral diseases: progress and challenges. *Nat. Med.* 10, S110–S121.
- Peterson, A.T., Lash, R.R., Carroll, D.S., and Johnson, K.M. (2006). Geographic potential for outbreaks of Marburg hemorrhagic fever. *Am. J. Trop. Med. Hyg.* 75, 9–15.
- Abir, M.H., Rahman, T., Das, A., Etu, S.N., Nafiz, I.H., Rakib, A., Mitra, S., Emran, T.B., Dhama, K., Islam, A., et al. (2022). Pathogenicity and virulence of Marburg virus. *Virulence* 13, 609–633.
- Mehedi, M., Groseth, A., Feldmann, H., and Ebihara, H. (2011). Clinical aspects of Marburg hemorrhagic fever. *Future Virol.* 6, 1091–1106.
- Becker, S., Spiess, M., and Klenk, H.-D. (1995). The asialoglycoprotein receptor is a potential liver-specific receptor for Marburg virus. *J. Gen. Virol.* 76 (Pt 2), 393–399.
- Bechtelsheimer, H., Korb, G., and Gedigk, P. (1971). Marburg Virus Disease, pp. 62–67.
- Geisbert, T.W., Daddario-DiCaprio, K.M., Geisbert, J.B., Young, H.A., Formenty, P., Fritz, E.A., Larsen, T., and Hensley, L.E. (2007). Marburg virus Angola infection of rhesus macaques: pathogenesis and treatment with recombinant nematode anticoagulant protein c2. *J. Infect. Dis.* 196, S372–S381.
- Olejnik, J., Ryabchikova, E., Corley, R.B., and Mühlberger, E. (2011). Intracellular events and cell fate in filovirus infection. *Viruses* 3, 1501–1531.
- Towner, J.S., Khristova, M.L., Sealy, T.K., Vincent, M.J., Erickson, B.R., Bawiec, D.A., Hartman, A.L., Comer, J.A., Zaki, S.R., Ströher, U., et al. (2006). Marburgvirus genomics and association with a large hemorrhagic fever outbreak in Angola. *J. Virol.* 80, 6497–6516.
- Hu, B., Zhong, L., Weng, Y., Peng, L., Huang, Y., Zhao, Y., and Liang, X.-J. (2020). Therapeutic siRNA: state of the art. *Signal Transduct. Target. Ther.* 5, 101.
- Thi, E.P., Mire, C.E., Lee, A.C., Geisbert, J.B., Ursic-Bedoya, R., Agans, K.N., Robbins, M., Deer, D.J., Cross, R.W., Kondratowicz, A.S., et al. (2017). siRNA rescues nonhuman primates from advanced Marburg and Ravn virus disease. *J. Clin. Invest.* 127, 4437–4448.

13. Ursic-Bedoya, R., Mire, C.E., Robbins, M., Geisbert, J.B., Judge, A., MacLachlan, I., and Geisbert, T.W. (2014). Protection against lethal Marburg virus infection mediated by lipid encapsulated small interfering RNA. *J. Infect. Dis.* 209, 562–570.
14. Thi, E.P., Mire, C.E., Lee, A.C.H., Geisbert, J.B., Zhou, J.Z., Agans, K.N., Snead, N.M., Deer, D.J., Barnard, T.R., Fenton, K.A., et al. (2015). Lipid nanoparticle siRNA treatment of Ebola virus Makona infected nonhuman primates. *Nature* 521, 362–365.
15. Lim, S.A., Cox, A., Tung, M., and Chung, E.J. (2022). Clinical progress of nanomedicine-based RNA therapies. *Bioact. Mater.* 12, 203–213.
16. Guo, S., Li, K., Hu, B., Li, C., Zhang, M., Hussain, A., Wang, X., Cheng, Q., Yang, F., Ge, K., et al. (2021). Membrane-destabilizing ionizable lipid empowered imaging-guided siRNA delivery and cancer treatment. *Exploration (Beijing)* 1, 35–49.
17. Yonezawa, S., Koide, H., and Asai, T. (2020). Recent advances in siRNA delivery mediated by lipid-based nanoparticles. *Adv. Drug Deliv. Rev.* 154–155, 64–78.
18. O'Sullivan, J., Muñoz-Muñoz, J., Turnbull, G., Sim, N., Penny, S., and Moschos, S. (2022). Beyond GalNAc: Drug delivery systems comprising complex oligosaccharides for targeted use of nucleic acid therapeutics. *RSC Adv.* 12, 20432–20446.
19. Debacker, A.J., Voutila, J., Catley, M., Blakey, D., and Habib, N. (2020). Delivery of Oligonucleotides to the liver with GalNAc – from research to registered therapeutic drug. *Mol. Ther.* 28, 1759–1771.
20. Feldmann, H., Volchkov, V.E., Volchkova, V.A., and Klenk, H.D. (1999). The glycoproteins of Marburg and Ebola virus and their potential roles in pathogenesis. *Arch. Virol. Suppl.* 15, 159–169.
21. Alves, D.A., Glynn, A.R., Steele, K.E., Lackemeyer, M.G., Garza, N.L., Buck, J.G., Mech, C., and Reed, D.S. (2010). Aerosol exposure to the Angola strain of Marburg virus causes lethal viral hemorrhagic fever in cynomolgus macaques. *Vet. Pathol.* 47, 831–851.
22. Azad, A.K., Rajaram, M.V.S., and Schlesinger, L.S. (2014). Exploitation of the macrophage mannose receptor (CD206) in infectious disease diagnostics and therapeutics. *J. Cytol. Mol. Biol.* 1, 1000003.
23. Feinberg, H., Jégouzo, S.A.F., Lasanajak, Y., Smith, D.F., Drickamer, K., Weis, W.I., and Taylor, M.E. (2021). Structural analysis of carbohydrate binding by the macrophage mannose receptor CD206. *J. Biol. Chem.* 296, 100368.
24. Boldescu, V., Crudu, V., Sucman, N., Pogrebnoi, S., Zviaghințeva, M., Stingaci, E., Pogrebnoi, V., and Macaez, F. (2013). Molecular concepts of macrophage targeting. *ChemJMod.* 8, 21–31.
25. Westerlund, U., Westman, J., Törnquist, E., Smith, C.I.E., Oscarson, S., Lahmann, M., and Norberg, T. (2004). Ligands of the asialoglycoprotein receptor for targeted gene delivery, part I: synthesis of and binding studies with biotinylated cluster glycosides containing N-acetylgalactosamine. *Glycoconj. J.* 21, 227–241.
26. Lee, R.T., Lin, P., and Lee, Y.C. (1984). New synthetic cluster ligands for galactose/N-acetylgalactosamine-specific lectin of mammalian liver. *Biochemistry* 23, 4255–4261.
27. Connolly, D.T., Townsend, R.R., Kawaguchi, K., Bell, W.R., and Lee, Y.C. (1982). Binding and endocytosis of cluster glycosides by rabbit hepatocytes. Evidence for a short-circuit pathway that does not lead to degradation. *J. Biol. Chem.* 257, 939–945.
28. Holland, R.J., Lam, K., Ye, X., Martin, A.D., Wood, M.C., Palmer, L., Fraser, D., McClintock, K., Majeski, S., Jarosz, A., et al. (2021). Ligand conjugate SAR and enhanced delivery in NHP. *Mol. Ther.* 29, 2910–2919.
29. Wollenberg, A., Mommaas, M., Ooppel, T., Schottdorf, E.M., Günther, S., and Moderer, M. (2002). Expression and function of the mannose receptor CD206 on epidermal dendritic cells in inflammatory skin diseases. *J. Invest. Dermatol.* 118, 327–334.
30. Cochand, L., Isler, P., Songeon, F., and Nicod, L.P. (1999). Human lung dendritic cells have an immature phenotype with efficient mannose receptors. *Am. J. Respir. Cell Mol. Biol.* 21, 547–554.
31. Sallusto, F., Cella, M., Danieli, C., and Lanzavecchia, A. (1995). Dendritic cells use macropinocytosis and the mannose receptor to concentrate macromolecules in the major histocompatibility complex class II compartment: downregulation by cytokines and bacterial products. *J. Exp. Med.* 182, 389–400.
32. Mellman, I., Turley, S.J., and Steinman, R.M. (1998). Antigen processing for amateurs and professionals. *Trends Cell Biol.* 8, 231–237.
33. Gonçalves, R., and Mosser, D.M. (2015). The isolation and characterization of murine macrophages. *Curr. Protoc. Immunol.* 111, 14.1.1–14.1.16.
34. Zhang, X., Goncalves, R., and Mosser, D.M. (2008). The isolation and characterization of murine macrophages. *Curr. Protoc. Immunol.* 83, 14–14.1.14.
35. Elchaninov, A.V., Fatkhudinov, T.K., Vishnyakova, P.A., Lokhonina, A.V., and Sukhikh, G.T. (2019). Phenotypical and functional polymorphism of liver resident macrophages. *Cells* 8, 1032.
36. Cross, R.W., Fenton, K.A., Geisbert, J.B., Ebihara, H., Mire, C.E., and Geisbert, T.W. (2015). Comparison of the pathogenesis of the Angola and ravn strains of Marburg virus in the outbred Guinea pig model. *J. Infect. Dis.* 212, S258–S270.
37. Foster, D.J., Brown, C.R., Shaikh, S., Trapp, C., Schlegel, M.K., Qian, K., Sehgal, A., Rajeev, K.G., Jadhav, V., Manoharan, M., et al. (2018). Advanced siRNA designs further improve in vivo performance of GalNAc-siRNA conjugates. *Mol. Ther.* 26, 708–717.
38. Suzuki, Y., Shirai, M., Asada, K., Yasui, H., Karayama, M., Hozumi, H., Furuhashi, K., Enomoto, N., Fujisawa, T., Nakamura, Y., et al. (2018). Macrophage mannose receptor, CD206, predict prognosis in patients with pulmonary tuberculosis. *Sci. Rep.* 8, 13129.
39. Geijtenbeek, T.B.H., and Gringhuis, S.I. (2009). Signalling through C-type lectin receptors: shaping immune responses. *Nat. Rev. Immunol.* 9, 465–479.
40. Martinez-Pomares, L. (2012). The mannose receptor. *J. Leukoc. Biol.* 92, 1177–1186.
41. Qiao, N., Du, G., Zhong, X., and Sun, X. (2021). Recombinant lactic acid bacteria as promising vectors for mucosal vaccination. *Exploration (Beijing)* 1, 20210026.
42. Lee, C., Jeong, H., Bae, Y., Shin, K., Kang, S., Kim, H., Oh, J., and Bae, H. (2019). Targeting of M2-like tumor-associated macrophages with a melittin-based proapoptotic peptide. *J. Immunother. Cancer* 7, 147.
43. Zhan, X., Jia, L., Niu, Y., Qi, H., Chen, X., Zhang, Q., Zhang, J., Wang, Y., Dong, L., and Wang, C. (2014). Targeted depletion of tumour-associated macrophages by an alendronate–glucosaminan conjugate for cancer immunotherapy. *Biomaterials* 35, 10046–10057.
44. Li, Y., Wu, H., Ji, B., Qian, W., Xia, S., Wang, L., Xu, Y., Chen, J., Yang, L., and Mao, H. (2020). Targeted imaging of CD206 expressing tumor-associated M2-like macrophages using mannose-conjugated antibiobiofouling magnetic iron oxide nanoparticles. *ACS Appl. Bio Mater.* 3, 4335–4347.
45. Diebold, S.S., Plank, C., Cotten, M., Wagner, E., and Zenke, M. (2002). Mannose receptor-mediated gene delivery into antigen presenting dendritic cells. *Somat. Cell Mol. Genet.* 27, 65–74.
46. Glass, E.B., Masjedi, S., Dudzinski, S.O., Wilson, A.J., Duvall, C.L., Yull, F.E., and Giorgio, T.D. (2019). Optimizing mannose “click” conjugation to polymeric nanoparticles for targeted siRNA delivery to human and murine macrophages. *ACS Omega* 4, 16756–16767.
47. Kaps, L., Leber, N., Klefenz, A., Choteschovsky, N., Zentel, R., Nuhn, L., and Schuppan, D. (2020). In vivo siRNA delivery to immunosuppressive liver macrophages by  $\alpha$ -mannosyl-functionalized cationic nanohydrogel particles. *Cells* 9, 1905.
48. Dalle Vedove, E., Costabile, G., and Merkel, O.M. (2018). Mannose and mannose-6-phosphate receptor–targeted drug delivery systems and their application in cancer therapy. *Adv. Healthc. Mater.* 7, 1701398.
49. Irache, J.M., Salman, H.H., Gamazo, C., and Espuelas, S. (2008). Mannose-targeted systems for the delivery of therapeutics. *Expert Opin. Drug Deliv.* 5, 703–724.
50. Zhao, Y., Zhang, Z., Pan, Z., and Liu, Y. (2021). Advanced bioactive nanomaterials for biomedical applications. *Exploration (Beijing)* 1, 20210089.
51. Drickamer, K. (1995). Multiplicity of lectin-carbohydrate interactions. *Nat. Struct. Biol.* 2, 437–439.
52. Kelly, A., Grabiec, A.M., and Travis, M.A. (2018). Culture of human monocyte-derived macrophages. *Macrophages Methods and Protocols* 1784 (Humana New York), pp. 1–11.
53. Raggi, F., Pelassa, S., Pierobon, D., Penco, F., Gattorno, M., Novelli, F., Eva, A., Varesio, L., Giovarelli, M., and Bosco, M.C. (2017). Regulation of human macrophage M1–M2 polarization balance by hypoxia and the triggering receptor expressed on myeloid cells-1. *Front. Immunol.* 8, 1097.
54. Bertani, F.R., Mozetic, P., Fioramonti, M., Iuliani, M., Ribelli, G., Pantano, F., Santini, D., Tonini, G., Trombetta, M., Businaro, L., et al. (2017). Classification of M1/M2-polarized human macrophages by label-free hyperspectral reflectance confocal microscopy and multivariate analysis. *Sci. Rep.* 7, 8965.

55. Lescoat, A., Ballerie, A., Jouneau, S., Fardel, O., Vernhet, L., Jego, P., and Lecureur, V. (2019). M1/M2 polarisation state of M-CSF blood-derived macrophages in systemic sclerosis. *Ann. Rheum. Dis.* 78, e127.
56. Murray, P.J., Allen, J.E., Biswas, S.K., Fisher, E.A., Gilroy, D.W., Goerdt, S., Gordon, S., Hamilton, J.A., Ivashkiv, L.B., Lawrence, T., et al. (2014). Macrophage activation and polarization: nomenclature and experimental Guidelines. *Immunity* 41, 14–20.
57. Mosser, D.M., and Edwards, J.P. (2008). Exploring the full spectrum of macrophage activation. *Nat. Rev. Immunol.* 8, 958–969.
58. Qian, C., Yun, Z., Yao, Y., Cao, M., Liu, Q., Hu, S., Zhang, S., and Luo, D. (2019). Heterogeneous macrophages: supersensors of exogenous inducing factors. *Scand. J. Immunol.* 90, e12768.
59. Brown, C.R., Gupta, S., Qin, J., Racie, T., He, G., Lentini, S., Malone, R., Yu, M., Matsuda, S., Shulga-Morskaya, S., et al. (2020). Investigating the pharmacodynamic durability of GalNAc–siRNA conjugates. *Nucleic Acids Res.* 48, 11827–11844.
60. Hussell, T., and Bell, T.J. (2014). Alveolar macrophages: plasticity in a tissue-specific context. *Nat. Rev. Immunol.* 14, 81–93.
61. Ströher, U., West, E., Bugany, H., Klenk, H.-D., Schnittler, H.-J., and Feldmann, H. (2001). Infection and activation of monocytes by Marburg and ebola viruses. *J. Virol.* 75, 11025–11033.
62. Cross, R.W., Bornholdt, Z.A., Prasad, A.N., Borisevich, V., Agans, K.N., Deer, D.J., Abelson, D.M., Kim, D.H., Shestowsky, W.S., Campbell, L.A., et al. (2021). Combination therapy protects macaques against advanced Marburg virus disease. *Nat. Commun.* 12, 1891.
63. Szekanecz, Z., and Koch, A.E. (2007). Macrophages and their products in rheumatoid arthritis. *Curr. Opin. Rheumatol.* 19, 289–295.
64. Maruotti, N., Annese, T., Cantatore, F.P., and Ribatti, D. (2013). Macrophages and angiogenesis in rheumatic diseases. *Vasc. Cell* 5, 11.
65. Cuda, C.M., Pope, R.M., and Perlman, H. (2016). The inflammatory role of phagocyte apoptotic pathways in rheumatic diseases. *Nat. Rev. Rheumatol.* 12, 543–558.
66. van der Heide, D., Weiskirchen, R., and Bansal, R. (2019). Therapeutic targeting of hepatic macrophages for the treatment of liver diseases. *Front. Immunol.* 10, 2852.
67. Poh, A.R., and Ernst, M. (2018). Targeting macrophages in cancer: from bench to bedside. *Front. Oncol.* 8, 49.
68. Prieve, M.G., Harvie, P., Monahan, S.D., Roy, D., Li, A.G., Blevins, T.L., Paschal, A.E., Waldheim, M., Bell, E.C., Galperin, A., et al. (2018). Targeted mRNA therapy for ornithine transcarbamylase deficiency. *Mol. Ther.* 26, 801–813.
69. Aoyama, T., Kuwahara-Arai, K., Uchiyama, A., Kon, K., Okubo, H., Yamashina, S., Ikejima, K., Kokubu, S., Miyazaki, A., and Watanabe, S. (2017). Spleen-derived lipocalin-2 in the portal vein regulates Kupffer cells activation and attenuates the development of liver fibrosis in mice. *Lab. Invest.* 97, 890–902.

YMTHE, Volume 31

## **Supplemental Information**

### **Combination treatment of mannose and GalNAc conjugated small interfering RNA protects against lethal Marburg virus infection**

**Xin Ye, Richard Holland, Mark Wood, Chris Pasetka, Lorne Palmer, Eleni Samaridou, Kevin McClintock, Viktoriya Borisevich, Thomas W. Geisbert, Robert W. Cross, and James Heyes**

## Supplemental Information

### Supplemental data items

Figure S1: Biotinylated Mannose and GalNAc ligands

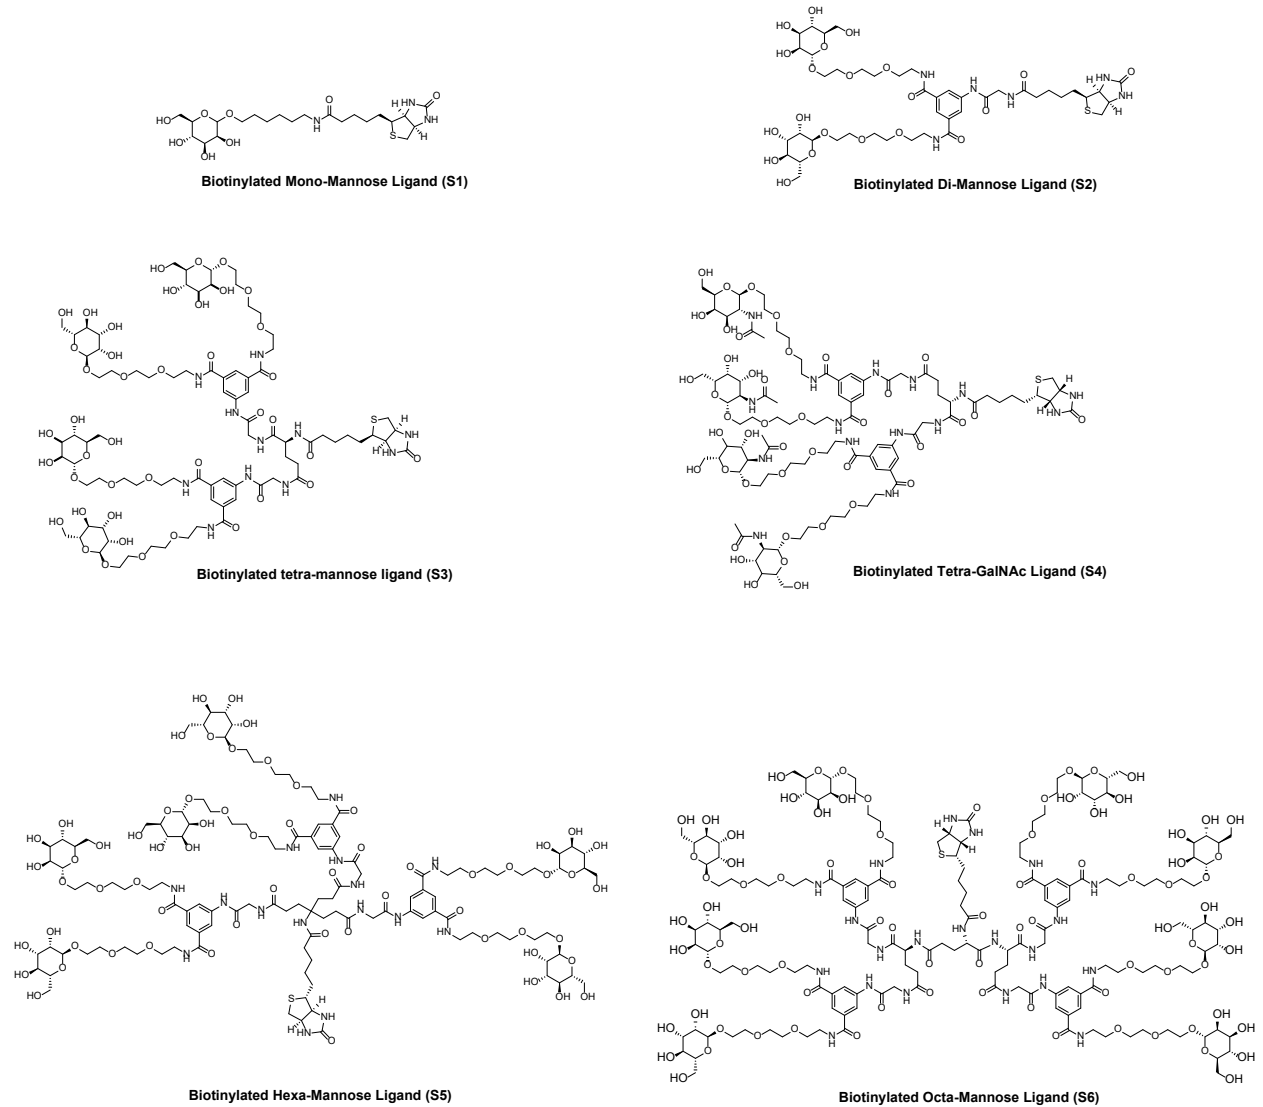

**Figure S2: Tetra- and Hexa-valent Mannose and GalNAc siRNA Conjugates**

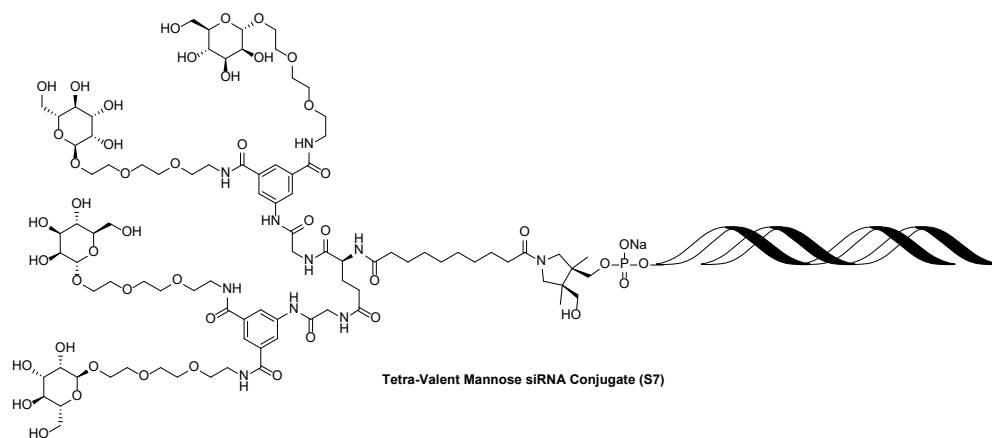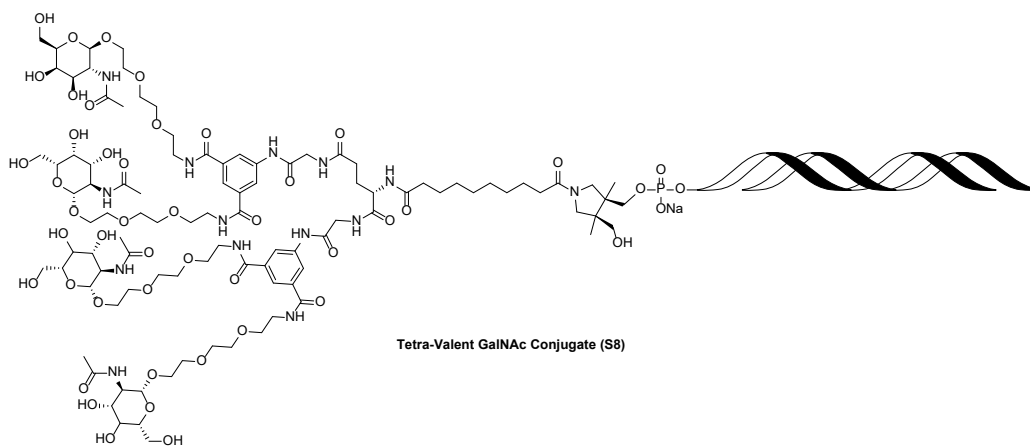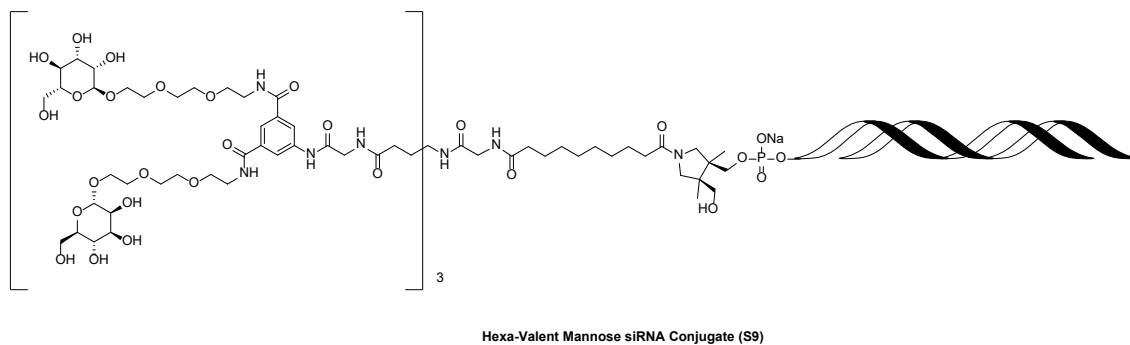



**Figure S3:** Preparation of mono-valent mannose ligand

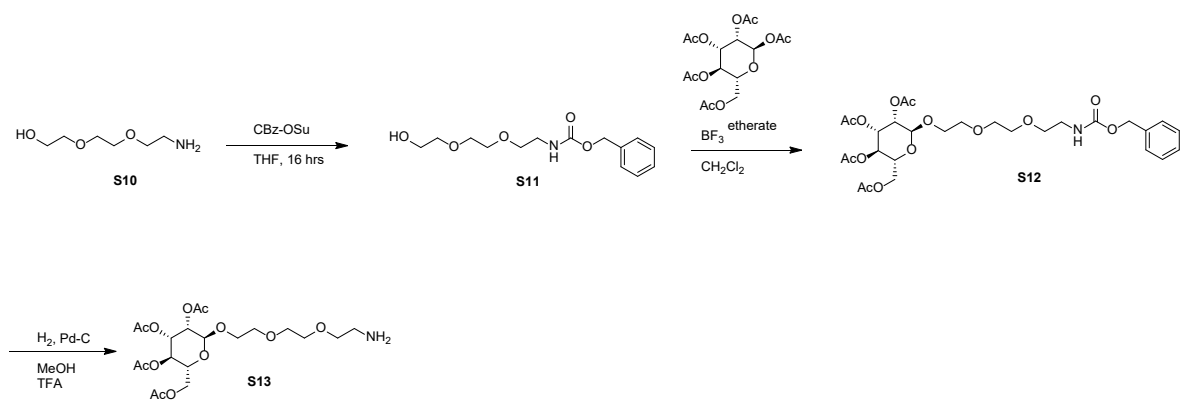

**Figure S4:** Preparation of di-valent mannose ligand

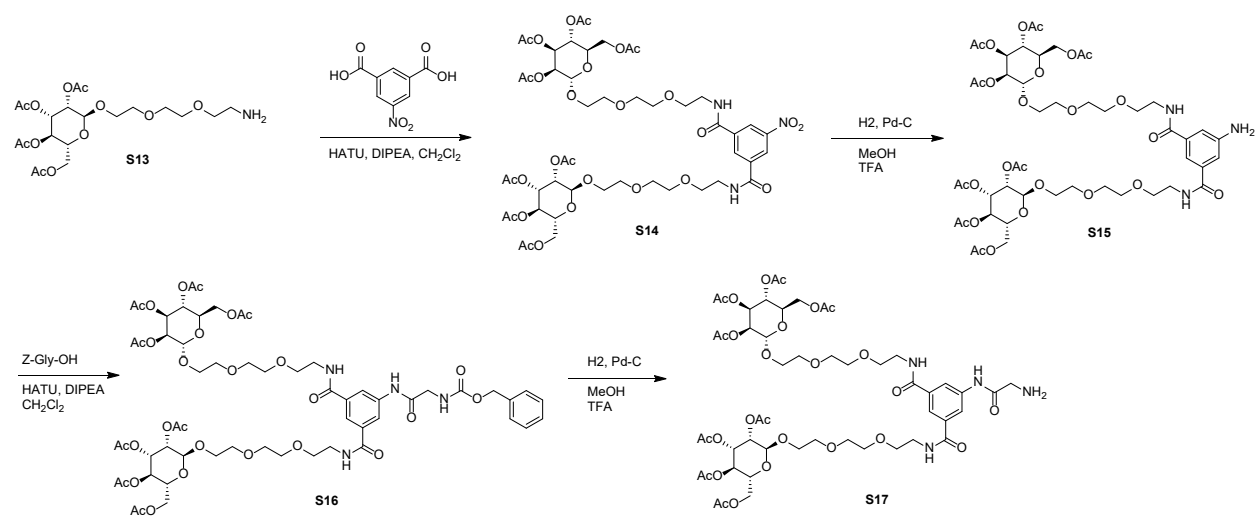

**Figure S5:** Preparation of tetra-valent mannose ligand

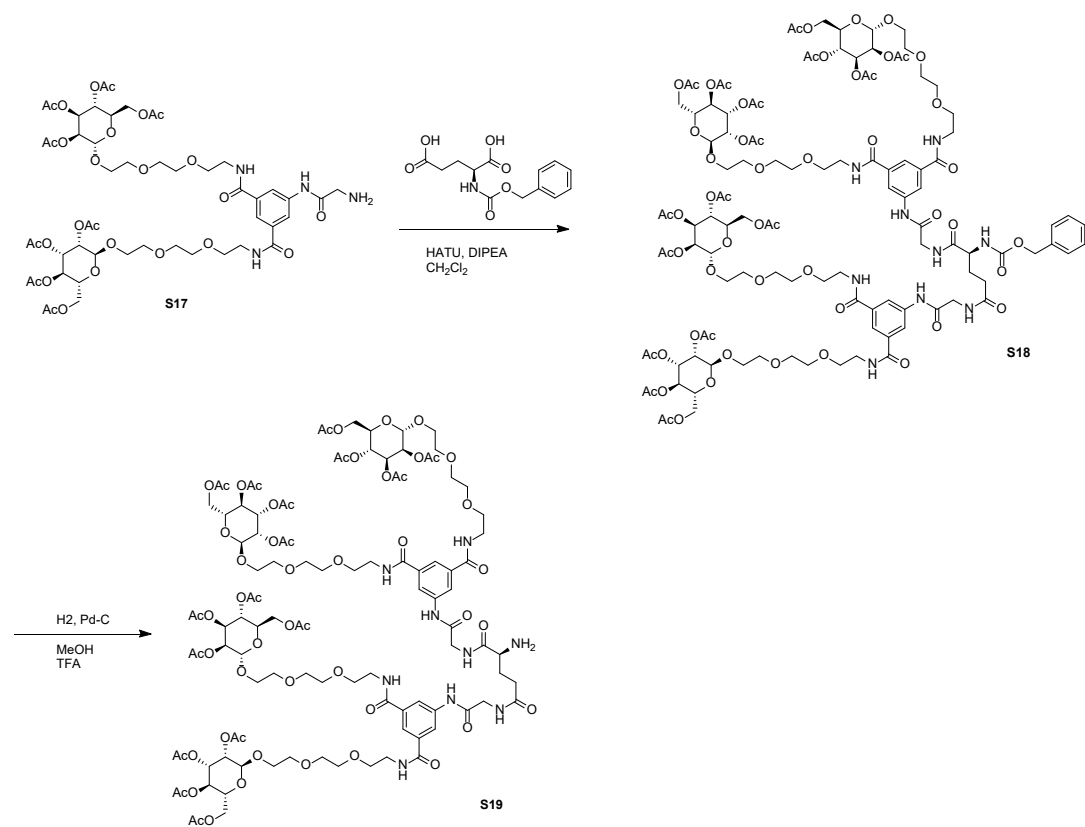

**Figure S6:** Preparation of hexa-valent mannose ligand

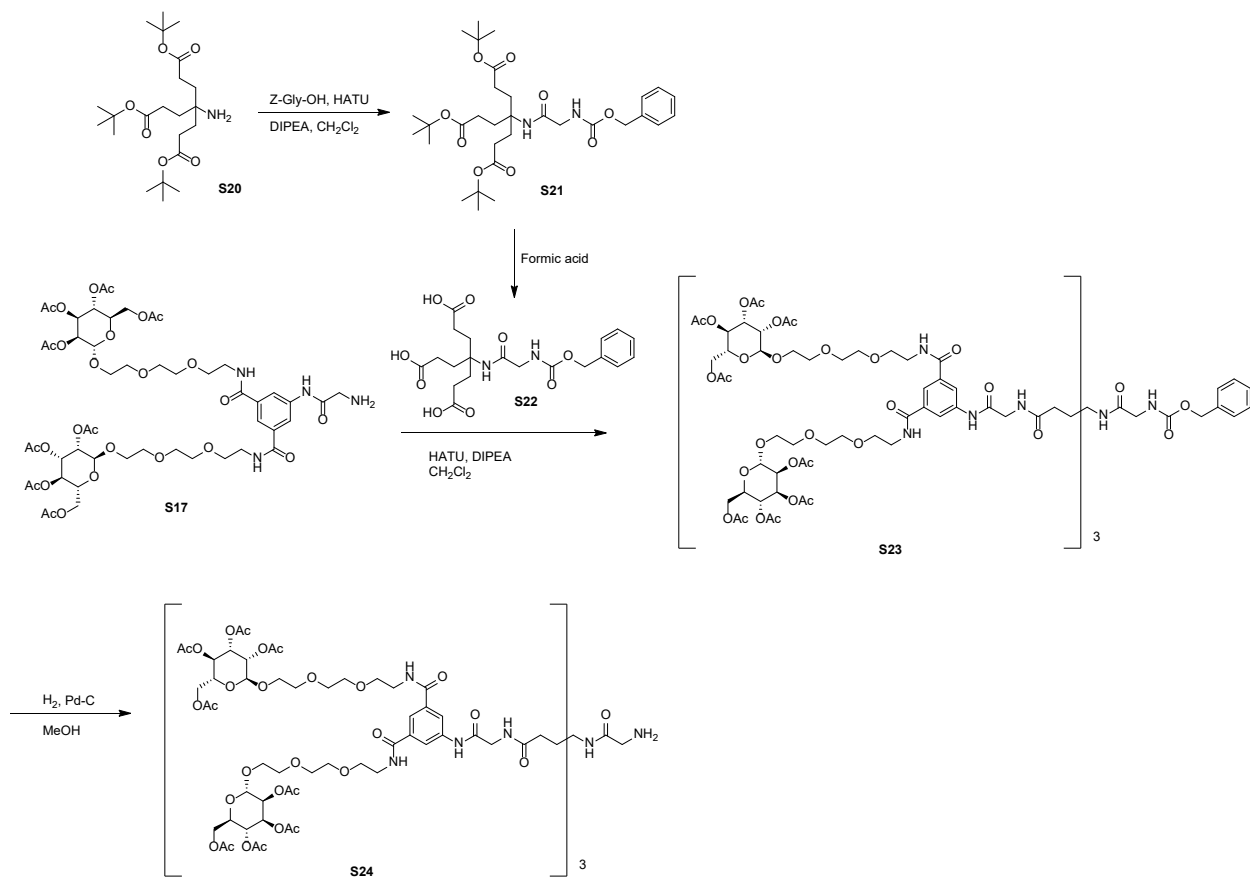

**Figure S7:** Preparation of biotinylated mannose ligand (**S2**)

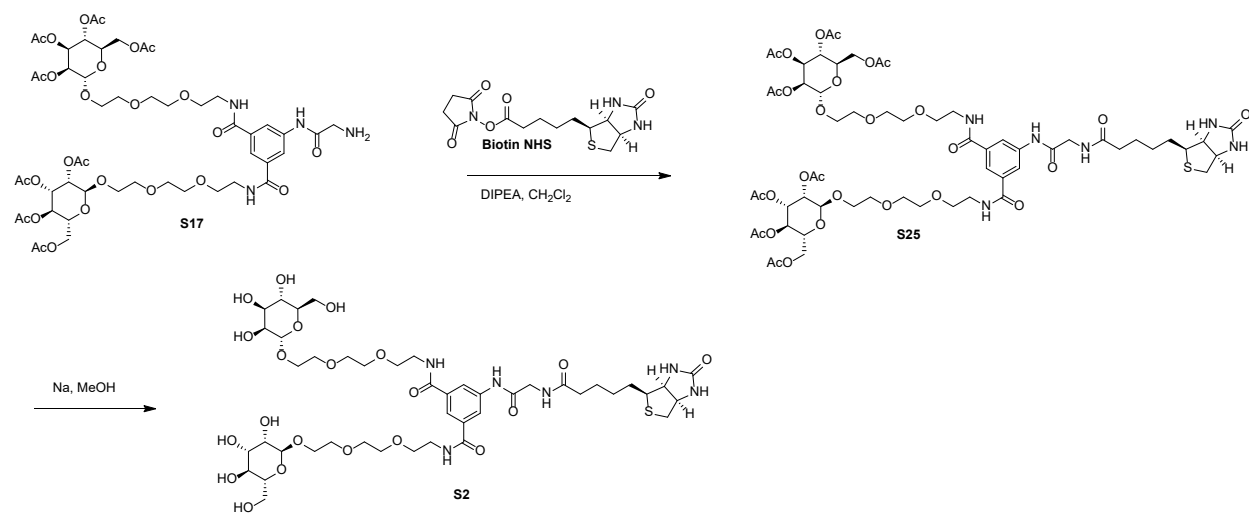

**Figure S8:** Preparation of mannose and GalNAc controlled pore glass (CPG) solid support for siRNA synthesis

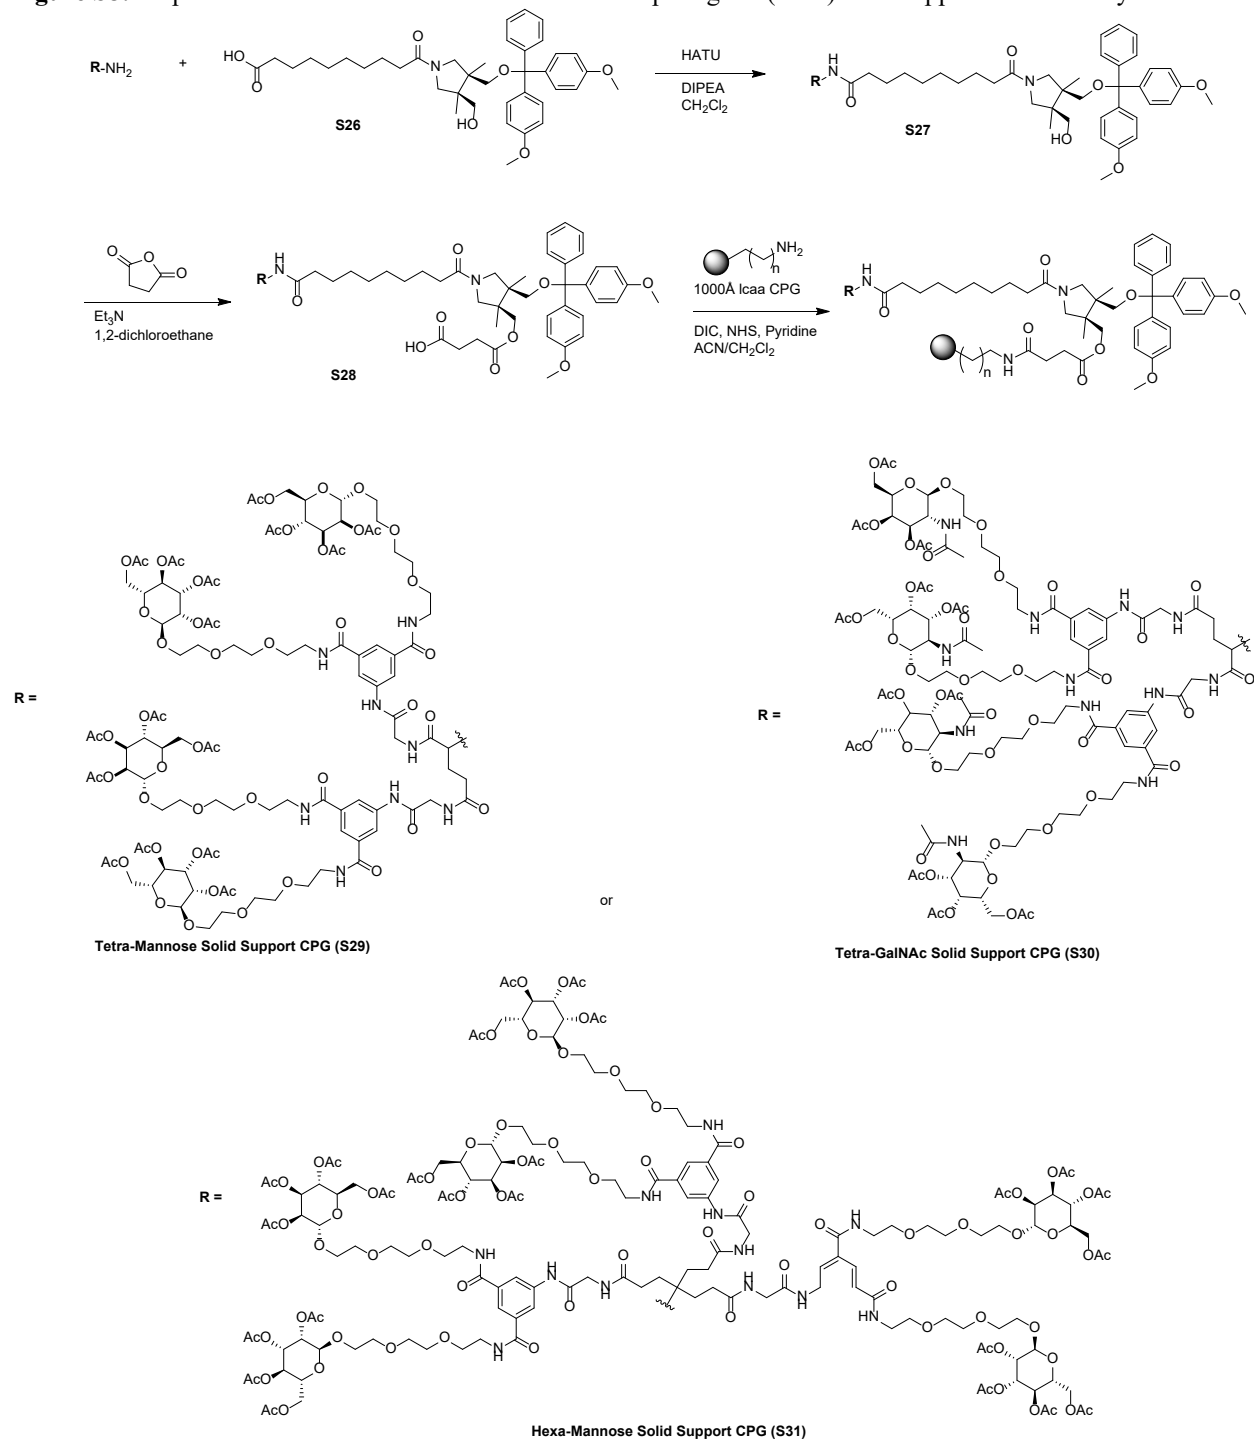

**Figure S9**

Cy3 labelled hexa-mannose-siCD45, tetra-mannose-siCD45 or tetra-GalNAc-siCD45 were incubated with M1 macrophages cells. The delivery of conjugates was determined by detection of Cy3 fluorescence under a fluorescent microscope. Cell nuclei were stained with DAPI. Scale bar = 100  $\mu$ m.

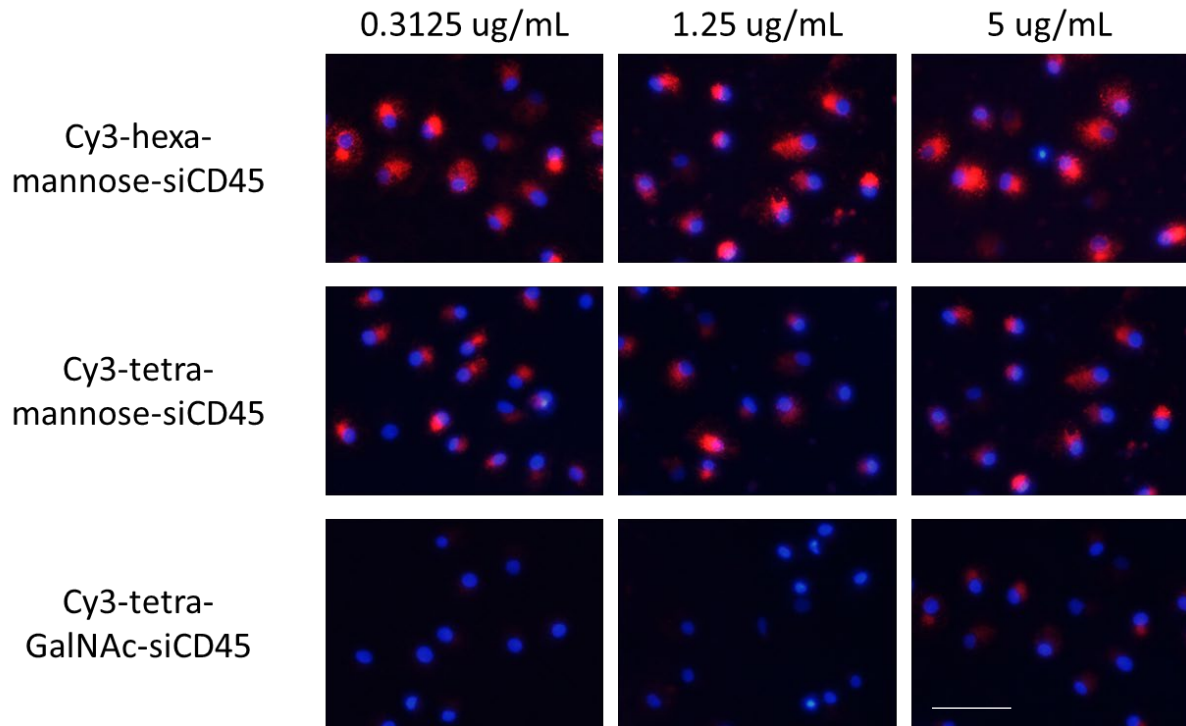

**Figure S10: Endosome Release Polymers (ERP)**

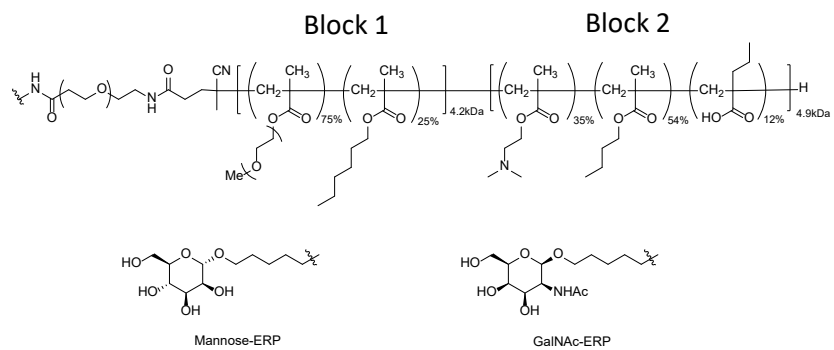

|                               |                                                             |
|-------------------------------|-------------------------------------------------------------|
| Block 1 Monomer incorporation | Monomer manufacturing release specification                 |
|                               | Polyethylene Glycol MethAcrylate 4-5 (PEGMA 4-5) – (71-79%) |
|                               | Hexyl MethAcrylate (HMA) – (21-29%)                         |
| Block 2 Monomer incorporation | DiMethylAminoEthyl Acrylate (DMAEA) – (30-40%)              |
|                               | ButylMethAcrylate (BMA) – (47-57%)                          |
|                               | PropylAcrylic Acid (PAA) – (9-16%)                          |



**Figure S11**

Hemolysis assay for the mannose-ERP. The polymer micelle was incubated with isolated RBCs at pH 7.4, 6.6 or 5.8 to mimic the extracellular, early endosome and late endosome pH environment respectively. The released hemoglobin was measured by absorbance at 400 nm and normalized to the positive control (RBC incubated with 20% Triton X-100). The data presented here represents the average signal from 3 replicates with standard deviations.

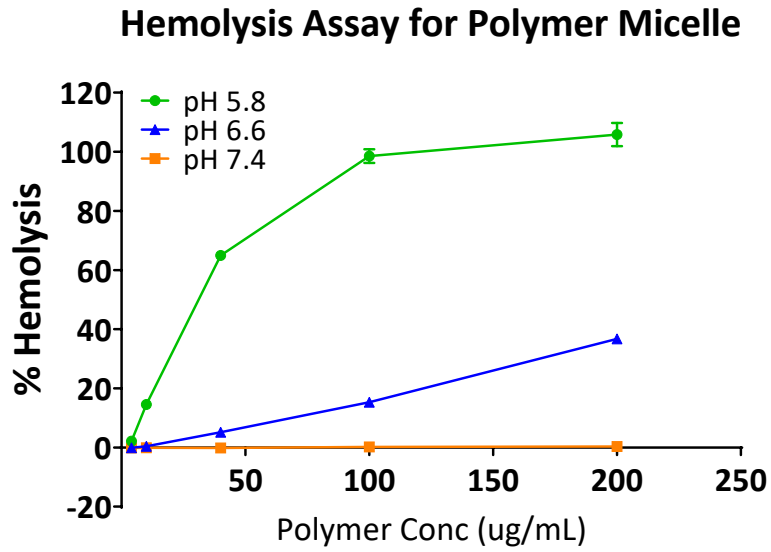

**Figure S12**

C57BL/6 female mice (n=4) were induced with 4% thioglycolate to elicit peritoneal macrophages. Animals were injected subcutaneously with a single dose of vehicle control (saline), AF647-hexa-mannose-siCD45 (10 mg/kg), AF647-hexa-mannose-siCD45 (10 mg/kg) + mannose-ERP (50 mg/kg) or mannose-ERP alone (50 mg/kg). The peritoneal cells of treated animals were collected at 24 h post siRNA and ERP treatment and analyzed with flow cytometry for the delivery of siRNA conjugate (AF647 fluorescence), CD206 receptor and CD45.

**A**

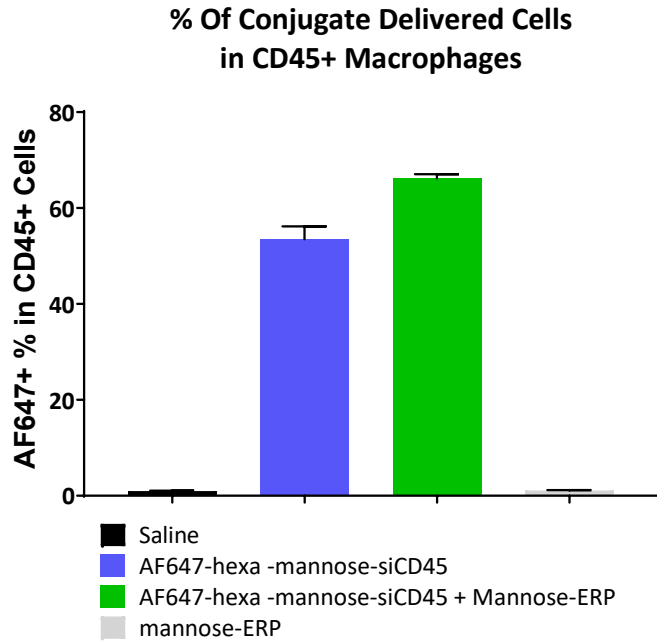

**B**

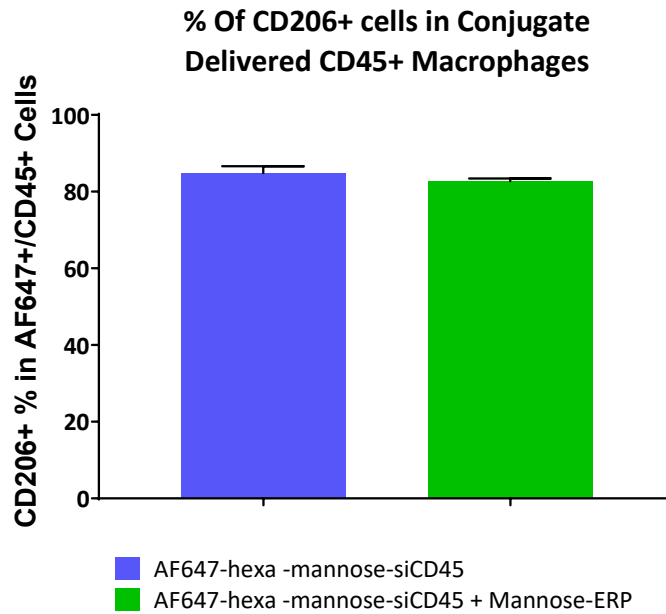

**Figure S13**

**A** Dosing schedule for guinea pig MARV challenge study in Figure 7

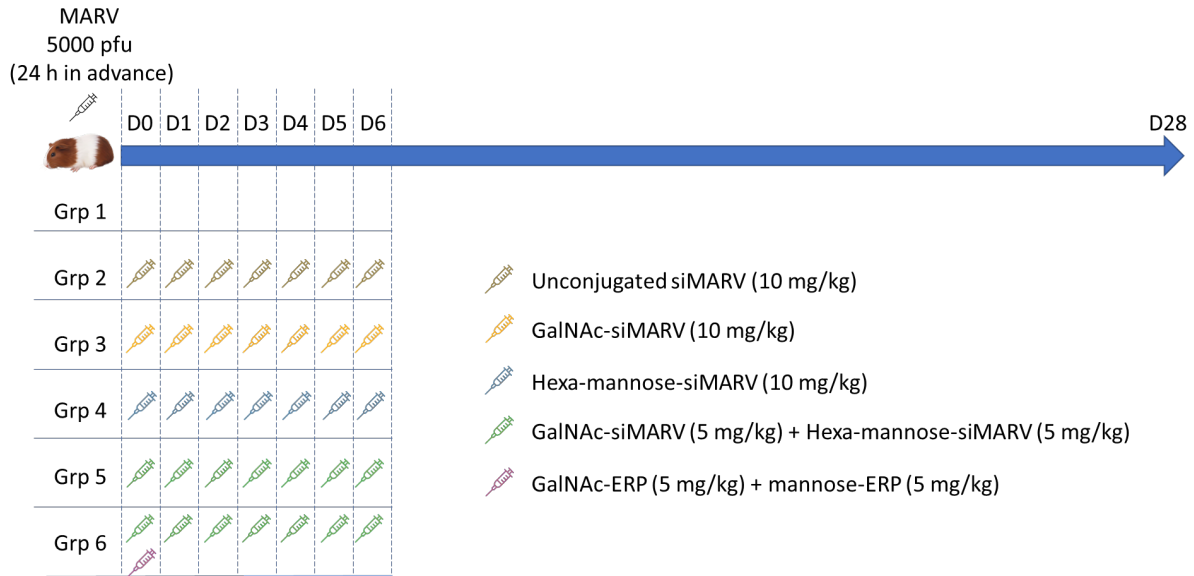

**B** Clinical score of animals in the guinea pig MARV challenge study in Figure 7. Animals were monitored daily to determine the clinical signs. Clinical score was assigned as follows: 0=normal; 1 = R (roughed); 2 = S (sick); 3 = death (euthanize, found dead, etc); Data were presented as the average score of the animals in each group

### Cage Ob Score

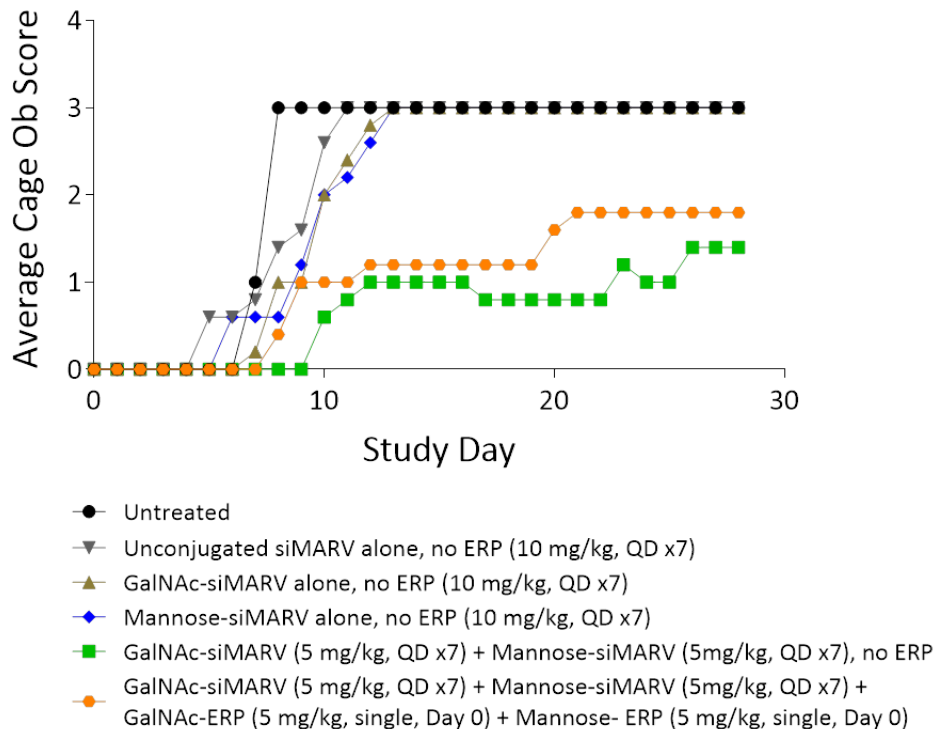

**Figure S14**

**A** Dosing schedule for guinea pig MARV challenge in Figure 8

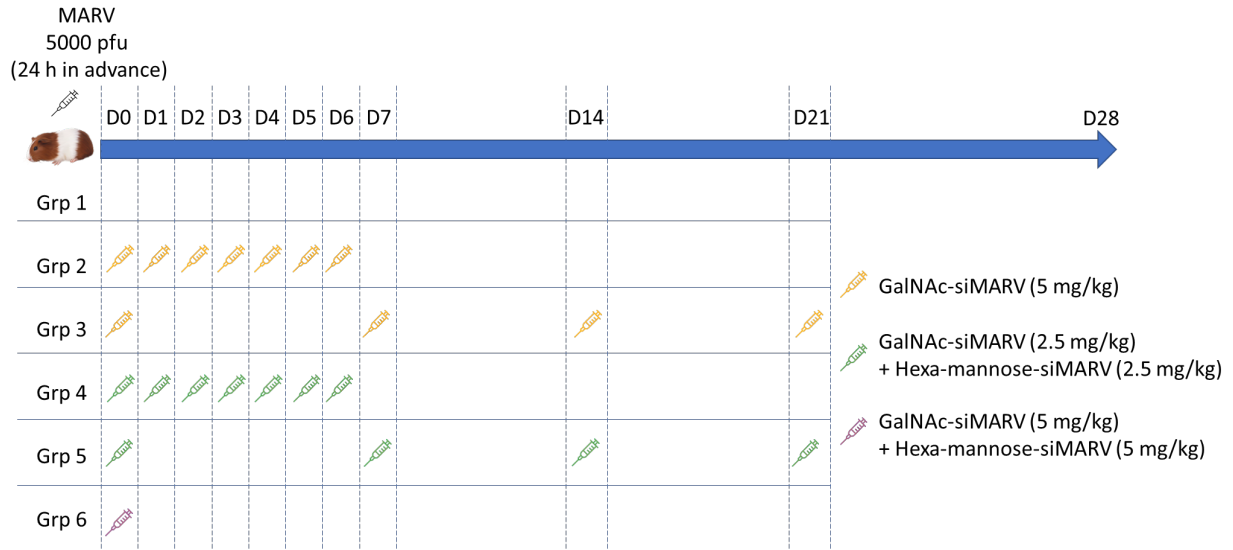

**B** Clinical score of animals in the guinea pig MARV challenge study in Figure 8. Animals were monitored daily to determine the clinical signs. Clinical score was assigned as follows: 0=normal; 1 = R (roughed); 2 = S (sick); 3 = death (euthanize, found dead, etc); Data were presented as the average score of the animals in each group

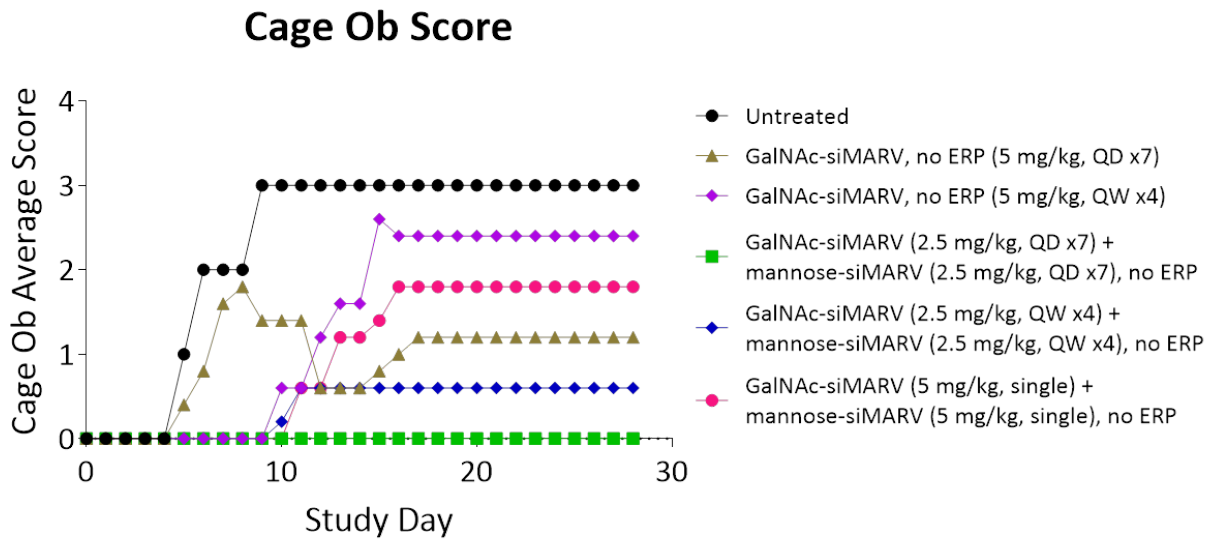

## Supplemental Methods

Preparation of mono-, di-, tetra- and hexa-valent mannose ligands (Figures S3, S4, S5 and S6):

**Synthesis of Compound S11:** A solution of 2-[2-(2-aminoethoxy)ethoxy]ethanol **S10** (20.0 g, 134.1 mmol) and benzyl 2,5-dioxopyrrolidin-1-yl carbonate (33.4 g, 134.1 mmol) in THF (400 mL) was stirred for 16 hrs at RT. Upon completion, the solution was concentrated to dryness, redissolved in EtOAc (400 mL), washed with 0.25M NaOH (250mL) and brine (1 x 200 mL), dried (MgSO<sub>4</sub>), filtered, and concentrated *in-vacuo*. Purification by automated column chromatography (0-7% MeOH in DCM) gave benzyl *N*-{2-[2-(2-hydroxyethoxy)ethoxy]ethyl} carbamate **S11** (28.5 g, 80%).

**Synthesis of Compound S12:** To a cooled (0°C) solution of 1,2,3,4,6-Penta-*O*-acetyl- $\alpha$ -D-mannopyranose (64.3 g, 164.9 mmol) and benzyl *N*-{2-[2-(2-hydroxyethoxy)ethoxy]ethyl} carbamate **S11** (46.7 g, 164.8 mmol) in anhydrous DCM (400 mL) was added dropwise boron trifluoride diethyl etherate (163 mL, 1.32 mol) over 1h. The reaction was warmed to RT and stirred for 72 hr. Upon completion, the reaction was carefully poured into ice water (1 L). The organic layer was separated, washed with saturated NaHCO<sub>3</sub> (200 mL) and brine (200 mL), dried (MgSO<sub>4</sub>), filtered, and concentrated *in vacuo*. Purification by automated column chromatography (5% MeOH/DCM) gave **S12** (46.6 g, 46%).

**Synthesis of Compound S13:** To a solution of [(2R,3R,4S,5S)-3,4,5-tris(acetyloxy)-6-{2-[2-(2-((benzyloxy)carbonyl)amino)ethoxy]ethoxy]ethoxy}oxan-2-yl]methyl acetate **S12** (50 g, 81.5 mmol) in MeOH (200 mL, 0.41 M, 4 Vols) was added TFA

(6.24 mL, 81.5 mmol) and 10% palladium on carbon (2.5g, 5% wt/wt). The solution was gently sparged with hydrogen for 1 hr then vigorously stirred for 16 hr under a hydrogen atmosphere. Upon completion, the solution was sparged with nitrogen then filtered through celite and concentrated *in-vacuo* to give **S14** (44.6 g, 92.2%).

**Synthesis of Compound S14:** A solution of 5-nitrobenzene-1,3-dicarboxylic acid (6.35 g, 30.0 mmol), **S13** (44.6 g, 75.2 mmol), DIPEA (26.3 mL, 150.3 mmol) and HATU (25.2 g, 66.1 mmol) in DCM (500 mL) was stirred at RT for 16 hr. Upon completion, the reaction mixture was diluted with DCM (100 mL), washed with saturated NaHCO<sub>3</sub> (150 mL), dried (MgSO<sub>4</sub>), filtered and concentrated *in-vacuo*. Purification by automated column chromatography (0-15% MeOH/DCM) gave **S14** (46.5 g, quant.)

**Synthesis of Compound S15:** To a solution of **S14** (40.0 g, 35.3 mmol) in MeOH (250 mL) was added 10% palladium on carbon (2.0 g, 5% wt/wt). The solution was gently sparged with hydrogen for 1 hr then vigorously stirred at RT for 16 hr under a hydrogen atmosphere. Upon completion, the solution was sparged with nitrogen, filtered through celite and concentrated *in-vacuo*. The crude product was purified by automated column chromatography (0-10% MeOH/DCM) to give **S15** (32 g, 82%).

**Synthesis of Compound S16:** A solution of **S15** (32.0 g, 29.0 mmol), Z-Gly-OH (7.28 g, 34.8 mmol), HATU (14.3 g, 37.7 mmol) and DIPEA (20.3 mL, 116.0 mmol) in DCM (300 mL) was stirred for at RT for 2 hr. The reaction mixture was washed with saturated NaHCO<sub>3</sub> solution (200 mL), dried (MgSO<sub>4</sub>), filtered and concentrated *in-vacuo*. The residue was purified by automated column chromatography (0-5% MeOH/DCM) to give **S16** (31.0 g, 83%).

**Synthesis of Compound S17:** To a solution of **S16** (31.0 g, 23.9 mmol) and TFA (1.83 mL, 23.9 mmol) in MeOH (250 mL) was added 10% palladium on Carbon (2.0 g). The solution was gently sparged with hydrogen for 1 hr then vigorously stirred at RT under a hydrogen atmosphere for 16 hr. The solution was sparged with nitrogen, filtered through celite and concentrated *in-vacuo*. The crude product was purified by automated column chromatography (5-15% MeOH/DCM) to give **S17** (16.5 g, 54%).

**Synthesis of Compound S18:** A solution of **S17** (1.1 g, 0.9 mmol), (2S)-2-[[[(benzyloxy)carbonyl]amino]pentanedioic acid (111 mg, 0.4 mmol), HATU (360 mg, 1.0 mmol) and DIPEA (0.35 mL, 2.0 mmol) in DCM (25 mL) was stirred at RT for 16 hr. Upon completion, the reaction was diluted with DCM (50 mL), washed with saturated NaHCO<sub>3</sub> (50 mL), dried (MgSO<sub>4</sub>), filtered, and concentrated *in vacuo*. Purification by automated column chromatography (0-15% MeOH/DCM) gave **S18** (920 mg, 91%).

**Synthesis of Compound S19:** A solution of **S18** (920 mg, 0.36 mmol), 10% palladium on carbon wet (100 mg) and TFA (28  $\mu$ L, 0.36 mmol) in MeOH (75 mL) was stirred vigorously at RT for 16 hr under an atmosphere of hydrogen gas. The solution was filtered through celite and concentrated to give **S19** as a colorless solid (720 mg, 83%).

**Synthesis of Compound S20:** To a solution of Z-Gly-OH (5.5 g, 26.5 mmol), DIPEA (9.3 mL, 53.0 mmol) and HATU (10.5 g, 27.7 mmol) in DCM (100 mL) was added 1,7-di-tert-butyl 4-amino-4-[3-(tert-butoxy)-3-oxopropyl]heptanedioate **S20** (10.0 g, 24.1 mmol). The reaction was stirred at RT for 16 hr, washed (NaHCO<sub>3</sub> (100 mL)), dried (MgSO<sub>4</sub>) filtered and concentrated *in vacuo*. Purification by automated column chromatography gel (0-

50% EtOAc/ hexane) gave 1,7-di-tert-butyl 4-(2-{{[(benzyloxy)carbonyl]amino}acetamido)-4-[3-(tert-butoxy)-3-oxopropyl]heptanedioate **S21** as a colorless solid (8.0 g, 55%).

**Synthesis of Compound S22:** A solution of **S21** (8.0 g, 13.2 mmol) in formic acid (50 mL) was stirred at RT for 16 hr. Upon completion, the solution was concentrated *in vacuo*, precipitated from methyl tert-butyl ether (50 mL), filtered, and dried under vacuum to give **S22** (5.4 g, 93%).

**Synthesis of Compound S23:** To a solution of **S17** (15.0 g, 11.76 mmol, 3.3 equiv.), 4-(2-{{[(benzyloxy)carbonyl]amino}acetamido)-4-(2-carboxyethyl)heptanedioic acid **S22** (1.56 g, 3.6 mmol) and DIPEA (6.2 mL, 35.6 mmol) in DCM (100 mL) was added HATU (5.4 g, 14.3 mmol). The solution was stirred at RT for 16 hr. Upon completion, the solution was diluted (DCM 100mL), washed (saturated NaHCO<sub>3</sub> (2 x 100mL)), dried (MgSO<sub>4</sub>, filtered, and concentrated *in-vacuo*. Purification by automated column chromatography (0-10% MeOH/DCM) gave **S23** (12.3 g, 89%).

**Synthesis of Compound S24:** A solution of **S23** (13.0 g, 3.4 mmol), 10% palladium on carbon (1 g) and TFA (257 μL, 3.4 mmol) in MeOH (150 mL) was vigorously stirred at RT under an atmosphere of hydrogen gas for 16 hr. The solution was filtered through celite and concentrated to give **S24** (720 mg, 83%). The product was used without further purification.

Preparation of biotinylated mannose and GalNAc ligands (Figure S1):

**Synthesis of Compound S25:** A solution of **S17** (500 mg, 0.43 mmol), Biotin NHS (176 mg, 0.52 mmol) and DIPEA (188 μL, 1.1 mmol) in DCM (10 mL) was stirred at RT for 16 hr. The reaction was diluted with DCM (25 mL) washed with saturated NaHCO<sub>3</sub> solution (25 mL), dried (MgSO<sub>4</sub>), filtered, and concentrated *in-vacuo*. Purification by column chromatography (0-15% MeOH/DCM) gave **S25** (405 mg, 67.8%).

**Synthesis of Compound S2:** Sodium (5 mg, 0.22 mmol) was added to a solution of **S25** (400 mg, 0.29 mmol) in anhydrous MeOH (20 mL) and stirred at RT for 16 hr. Upon completion, the solution was concentrated *in-vacuo* and the residue purified by preparative HPLC (Agilent Zorbax SB-C18, PN 870150-902, 21.2mm x 150mm, 5μm; 0 – 30% acetonitrile/ water; 20 mL/min). The product was lyophilized to give **S2**. MS (ESI) m/z: [M + Na]<sup>+</sup> Calcd for C<sub>44</sub>H<sub>70</sub>N<sub>6</sub>NaO<sub>21</sub>S, 1073.42; Found 1073.42

**Synthesis of Compounds S1, S3, S4, S5 and S6:** Prepared using identical procedures to those describes for **S25** and **S2**. Purification was completed using preparative HPLC (as described for **S2**) or recrystallization from methanol.

Preparation of multi-valent mannose and GalNAc solid CPG supports for siRNA synthesis (Figures S2, S8):

**Synthesis of Compound S27:** A solution of **S19** (700 mg, 0.29 mmol), **S26** (187 mg, 0.29 mmol), HATU (164 mg, 0.43 mmol) and DIPEA (151 μL, 0.86 mmol) in DCM (50 mL) was stirred at RT for 16 hr. Upon completion, the reaction was diluted with DCM (50 mL), washed (saturated NaHCO<sub>3</sub> (50 mL)), dried (MgSO<sub>4</sub>), filtered, and concentrated *in-vacuo*. Purification by automated column chromatography gel (0-15% MeOH/DCM) gave **S27** (770 mg, 87%).

**Synthesis of Compound S28:** To a solution of **S27** (770 mg, 0.25 mmol) and TEA (354 μL, 2.5 mmol) in anhydrous DCE (20 mL) was added succinic anhydride (227 mg, 2.3 mmol). The solution was stirred at 75°C for 3 hr then quenched with MeOH (1 mL) with stirring for 15 mins. The reaction mixture was diluted with DCM (50 mL), washed with saturated NaHCO<sub>3</sub> (2 x 50mL), dried (MgSO<sub>4</sub>), filtered, and concentrated *in-vacuo* to give **S28** (740 mg, 93%). The product was used without further purification. <sup>1</sup>H NMR (400 MHz, MeOD) δ 8.22 (s, 2H), 8.17 (s, 2H), 7.95 (s, 2H), 7.44 – 7.37 (m, 2H), 7.33 – 7.15 (m, 8H), 6.85 (dt, J = 9.1, 2.4 Hz, 4H), 5.29 – 5.18 (m, 12H), 4.86 (s, 4H), 4.38 (t, J = 7.0 Hz, 1H), 4.22 (dd, J = 12.3, 5.0 Hz, 4H), 4.13 – 4.00 (m, 12H), 3.86 – 3.74 (m, 14H), 3.73 – 3.61 (m, 39H), 3.61 – 3.55 (m, 9H), 3.43 – 3.19 (m, 4H), 3.16 (q, J = 7.3 Hz, 2H), 3.12 – 2.97 (m, 1H), 2.53 – 2.41 (m, 6H), 2.33 – 2.18 (m, 4H), 2.12 (s, 12H), 2.04 (s, 12H), 2.03 (s, 12H), 1.94 (s, 12H), 1.65 – 1.50 (m, 4H), 1.39 – 1.33 (m, 2H), 1.32 – 1.21 (m, 8H), 1.21 – 1.12 (m, 3H), 1.12 – 1.03 (m, 3H).

**Synthesis of tetra-mannose siRNA Conjugate S7:** To a solution of **S28** (740 mg, 0.24 mmol), N-hydroxysuccinimide (5.5 mg, 0.05 mmol) and pyridine (58 μL, 0.71 mmol) in 1:1 MeCN/DCM (20 mL) was added 1000Å Ica CPG (long chain alkylamine controlled pore glass, 4.5 g). The suspension was gently agitated at RT for 16 hr. Upon completion, the CPG was filtered, rinsed with DCM, air dried and suspended in a solution of 10% acetic anhydride, 5% N-methylimidazole and 5% pyridine in THF (30 mL). After 2 hr, the suspension was filtered and the remaining CPG rinsed with THF (50 mL), MeCN (50 mL), DCM (50 mL) and dried under high vacuum to afford 4.8 g. The succinate loading efficiency was 23 μmol/g (determined by standard UV/Vis DMT assay @ 504 nm). The resulting tetra-valent mannose CPG solid support **S29** was employed in automated oligonucleotide synthesis using standard procedures. Nucleotide cleavage and deprotection, with concurrent mannose acetate deprotection, afforded

the 3' conjugated tetra-valent mannose sense strand. After purification by dual HPLC, the corresponding antisense strand was annealed to form siRNA duplex **S7**.

**Synthesis of tetra-GalNAc Conjugate S8:** Conjugate **S8** was prepared using an analogous method to Compound **S7** from tetra-valent GalNAc solid support CPG **S30** (see WO 2017/117326 for the preparation of tetra-valent GalNAc ligand and corresponding CPG solid support)

**Synthesis of hexa-mannose Conjugate S9:** Conjugate **S9** was prepared using an analogous method to Compound **S7** from hexa-mannose solid support CPG **S31**.
